# Supplementary material for: Synthesis of polyhalo 2-aryl-4-aminoquinazolines and 3-amino-indazoles as anti-cancer agents
Source: Royal Society of Chemistry journal article supplement (doi:10.1039/c3ra23059g), 2013-01-01
Supplement: c3ra23059g.pdf [file c3ra23059g.pdf]

# Synthesis of polyhalo 2-aryl-4-aminoquinazolines and 3-aminoindazoles as anticancer agents

Sheng-Jiao Yan<sup>a,1</sup>, Ying Dong<sup>a,1</sup>, Qiong Peng<sup>b</sup>, Yin-Xian Fan<sup>b</sup>,  
Ji-Hong Zhang<sup>b,\*</sup>, Jun Lin<sup>a,\*</sup>

<sup>a</sup> Key Laboratory of Medicinal Chemistry for Natural Resources (Yunnan University), Ministry of Education, School of Chemical Science and Technology, Yunnan University, Kunming 650091, PR China

<sup>b</sup> College of Life Science and Technology, Kunming University of Science and Technology, Kunming 650224, PR China

## Supporting Information

### Table of Contents

|                                                                                                                   |    |
|-------------------------------------------------------------------------------------------------------------------|----|
| General Information.....                                                                                          | 3  |
| General Procedure for the Preparation of Polyhalo 2-Aryl-4-aminoquinazolines <b>3</b> .....                       | 3  |
| Spectroscopic Data of Polyhalo 2-Aryl-4-aminoquinazolines <b>3</b> .....                                          | 4  |
| General Procedure for the Preparation of Polyhalo 3-Aminoindazoles <b>5</b> and <b>7</b> .....                    | 9  |
| Spectroscopic Data of Polyhalo 3-Aminoindazoles <b>5</b> and <b>7</b> .....                                       | 9  |
| <sup>1</sup> H NMR and <sup>13</sup> C NMR Spectra for Polyhalo 2-Aryl-4-aminoquinazolines <b>3</b> .....         | 13 |
| <b>Figure 1.</b> <sup>1</sup> H NMR (500 MHz, DMSO- <i>d</i> <sub>6</sub> ) spectra of compound <b>3a</b> .....   | 13 |
| <b>Figure 2.</b> <sup>13</sup> C NMR (125 MHz, DMSO- <i>d</i> <sub>6</sub> ) spectra of compound <b>3a</b> .....  | 13 |
| <b>Figure 3.</b> <sup>19</sup> F NMR (470 MHz, DMSO- <i>d</i> <sub>6</sub> ) spectra of compound <b>3a</b> .....  | 14 |
| <b>Figure 4.</b> <sup>1</sup> H NMR (500 MHz, DMSO- <i>d</i> <sub>6</sub> ) spectra of compound <b>3b</b> .....   | 14 |
| <b>Figure 5.</b> <sup>13</sup> C NMR (125 MHz, DMSO- <i>d</i> <sub>6</sub> ) spectra of compound <b>3b</b> .....  | 15 |
| <b>Figure 6.</b> <sup>1</sup> H NMR (500 MHz, DMSO- <i>d</i> <sub>6</sub> ) spectra of compound <b>3c</b> .....   | 15 |
| <b>Figure 7.</b> <sup>13</sup> C NMR (125 MHz, DMSO- <i>d</i> <sub>6</sub> ) spectra of compound <b>3c</b> .....  | 16 |
| <b>Figure 8.</b> <sup>1</sup> H NMR (500 MHz, DMSO- <i>d</i> <sub>6</sub> ) spectra of compound <b>3d</b> .....   | 16 |
| <b>Figure 9.</b> <sup>13</sup> C NMR (125 MHz, DMSO- <i>d</i> <sub>6</sub> ) spectra of compound <b>3d</b> .....  | 17 |
| <b>Figure 10.</b> <sup>1</sup> H NMR (500 MHz, DMSO- <i>d</i> <sub>6</sub> ) spectra of compound <b>3e</b> .....  | 17 |
| <b>Figure 11.</b> <sup>13</sup> C NMR (125 MHz, DMSO- <i>d</i> <sub>6</sub> ) spectra of compound <b>3e</b> ..... | 18 |
| <b>Figure 12.</b> <sup>1</sup> H NMR (500 MHz, DMSO- <i>d</i> <sub>6</sub> ) spectra of compound <b>3f</b> .....  | 18 |
| <b>Figure 13.</b> <sup>13</sup> C NMR (125 MHz, DMSO- <i>d</i> <sub>6</sub> ) spectra of compound <b>3f</b> ..... | 19 |
| <b>Figure 14.</b> <sup>1</sup> H NMR (500 MHz, DMSO- <i>d</i> <sub>6</sub> ) spectra of compound <b>3g</b> .....  | 19 |
| <b>Figure 15.</b> <sup>13</sup> C NMR (125 MHz, DMSO- <i>d</i> <sub>6</sub> ) spectra of compound <b>3g</b> ..... | 20 |
| <b>Figure 16.</b> <sup>1</sup> H NMR (500 MHz, DMSO- <i>d</i> <sub>6</sub> ) spectra of compound <b>3h</b> .....  | 20 |
| <b>Figure 17.</b> <sup>13</sup> C NMR (125 MHz, DMSO- <i>d</i> <sub>6</sub> ) spectra of compound <b>3h</b> ..... | 21 |
| <b>Figure 18.</b> <sup>1</sup> H NMR (500 MHz, DMSO- <i>d</i> <sub>6</sub> ) spectra of compound <b>3i</b> .....  | 21 |
| <b>Figure 19.</b> <sup>13</sup> C NMR (125 MHz, DMSO- <i>d</i> <sub>6</sub> ) spectra of compound <b>3i</b> ..... | 22 |
| <b>Figure 20.</b> <sup>1</sup> H NMR (500 MHz, CDCl <sub>3</sub> ) spectra of compound <b>3j</b> .....            | 22 |

|                                                                                                         |    |
|---------------------------------------------------------------------------------------------------------|----|
| <b>Figure 21.</b> $^{13}\text{C}$ NMR (125 MHz, $\text{CDCl}_3$ ) spectra of compound <b>3j</b> .....   | 23 |
| <b>Figure 22.</b> $^1\text{H}$ NMR (500 MHz, $\text{DMSO-}d_6$ ) spectra of compound <b>3k</b> .....    | 23 |
| <b>Figure 23.</b> $^{13}\text{C}$ NMR (125 MHz, $\text{DMSO-}d_6$ ) spectra of compound <b>3k</b> ..... | 24 |
| <b>Figure 24.</b> $^1\text{H}$ NMR (500 MHz, $\text{DMSO-}d_6$ ) spectra of compound <b>3l</b> .....    | 24 |
| <b>Figure 25.</b> $^{13}\text{C}$ NMR (125 MHz, $\text{DMSO-}d_6$ ) spectra of compound <b>3l</b> ..... | 25 |
| <b>Figure 26.</b> $^1\text{H}$ NMR (500 MHz, $\text{DMSO-}d_6$ ) spectra of compound <b>3m</b> .....    | 25 |
| <b>Figure 27.</b> $^{13}\text{C}$ NMR (125 MHz, $\text{DMSO-}d_6$ ) spectra of compound <b>3m</b> ..... | 26 |
| <b>Figure 28.</b> $^1\text{H}$ NMR (500 MHz, $\text{DMSO-}d_6$ ) spectra of compound <b>3n</b> .....    | 26 |
| <b>Figure 29.</b> $^{13}\text{C}$ NMR (125 MHz, $\text{DMSO-}d_6$ ) spectra of compound <b>3n</b> ..... | 27 |
| <b>Figure 30.</b> $^1\text{H}$ NMR (500 MHz, $\text{DMSO-}d_6$ ) spectra of compound <b>5a</b> .....    | 28 |
| <b>Figure 31.</b> $^{13}\text{C}$ NMR (125 MHz, $\text{DMSO-}d_6$ ) spectra of compound <b>5a</b> ..... | 28 |
| <b>Figure 32.</b> $^1\text{H}$ NMR (500 MHz, $\text{DMSO-}d_6$ ) spectra of compound <b>5b</b> .....    | 29 |
| <b>Figure 33.</b> $^{13}\text{C}$ NMR (125 MHz, $\text{DMSO-}d_6$ ) spectra of compound <b>5b</b> ..... | 29 |
| <b>Figure 34.</b> $^1\text{H}$ NMR (500 MHz, $\text{DMSO-}d_6$ ) spectra of compound <b>5c</b> .....    | 30 |
| <b>Figure 35.</b> $^{13}\text{C}$ NMR (125 MHz, $\text{DMSO-}d_6$ ) spectra of compound <b>5c</b> ..... | 30 |
| <b>Figure 36.</b> $^1\text{H}$ NMR (500 MHz, $\text{DMSO-}d_6$ ) spectra of compound <b>7a</b> .....    | 31 |
| <b>Figure 37.</b> $^{13}\text{C}$ NMR (125 MHz, $\text{DMSO-}d_6$ ) spectra of compound <b>7a</b> ..... | 31 |
| <b>Figure 38.</b> $^1\text{H}$ NMR (500 MHz, $\text{DMSO-}d_6$ ) spectra of compound <b>7b</b> .....    | 32 |
| <b>Figure 39.</b> $^{13}\text{C}$ NMR (125 MHz, $\text{DMSO-}d_6$ ) spectra of compound <b>7b</b> ..... | 32 |
| <b>Figure 40.</b> $^1\text{H}$ NMR (500 MHz, $\text{DMSO-}d_6$ ) spectra of compound <b>7c</b> .....    | 33 |
| <b>Figure 41.</b> $^{13}\text{C}$ NMR (125 MHz, $\text{DMSO-}d_6$ ) spectra of compound <b>7c</b> ..... | 33 |
| <b>Figure 42.</b> $^1\text{H}$ NMR (500 MHz, $\text{DMSO-}d_6$ ) spectra of compound <b>7d</b> .....    | 34 |
| <b>Figure 43.</b> $^{13}\text{C}$ NMR (125 MHz, $\text{DMSO-}d_6$ ) spectra of compound <b>7d</b> ..... | 34 |
| <b>Figure 44.</b> $^1\text{H}$ NMR (500 MHz, $\text{DMSO-}d_6$ ) spectra of compound <b>7e</b> .....    | 35 |
| <b>Figure 45.</b> $^{13}\text{C}$ NMR (125 MHz, $\text{DMSO-}d_6$ ) spectra of compound <b>7e</b> ..... | 35 |
| <b>Figure 46.</b> $^1\text{H}$ NMR (500 MHz, $\text{DMSO-}d_6$ ) spectra of compound <b>7f</b> .....    | 36 |
| <b>Figure 47.</b> $^{13}\text{C}$ NMR (125 MHz, $\text{DMSO-}d_6$ ) spectra of compound <b>7f</b> ..... | 36 |
| <b>Figure 48.</b> $^1\text{H}$ NMR (500 MHz, $\text{DMSO-}d_6$ ) spectra of compound <b>7g</b> .....    | 37 |
| <b>Figure 49.</b> $^{13}\text{C}$ NMR (125 MHz, $\text{DMSO-}d_6$ ) spectra of compound <b>7g</b> ..... | 37 |

## General Information

All compounds were fully characterized by spectroscopic data. The NMR spectra were recorded on a Bruker DRX500 ( $^1\text{H}$ : 500 MHz,  $^{13}\text{C}$ : 125 MHz), chemical shifts ( $\delta$ ) are expressed in ppm, and  $J$  values are given in Hz, and deuterated DMSO- $d_6$  was used as solvent. IR spectra were recorded on a FT-IR Thermo Nicolet Avatar 360 using KBr pellet. The reactions were monitored by thin layer chromatography (TLC) using silica gel GF<sub>254</sub>. The melting points were determined on XT-4A melting point apparatus and are uncorrected. HRMs were performed on a Agilent LC/Msd TOF instrument.

All chemicals and solvents were used as received without further purification unless otherwise stated. Column chromatography was performed on silica gel (200–300 mesh). Compounds **1**–**2** were purchased from Aldrich Corporation Limited.

### General Procedure for the Preparation of Polyhalo 2-Aryl-4-aminoquinazolines **3**

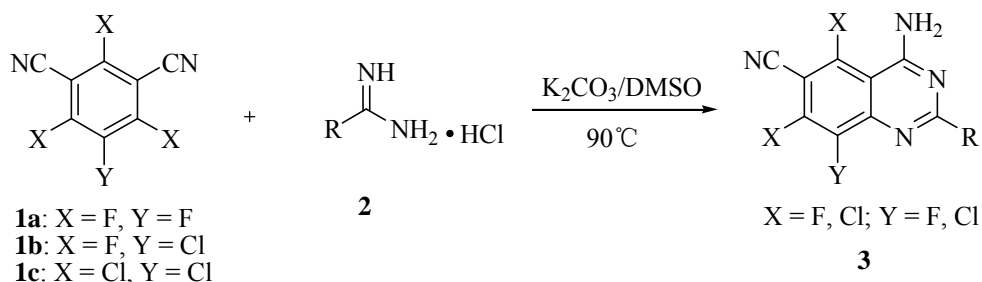

A 25 mL round-bottom flask was charged with isophthalonitrile derivatives **1** (2 mmol), amidine hydrochlorides **2** (2 mmol) and DMSO (10 mL), then the solution was added to  $\text{K}_2\text{CO}_3$  (6 mmol), and the mixture was heated 90 °C. The resulting solution was stirred for 2–8 h until the isophthalonitrile derivatives **1** was completely consumed. The reaction mixture was poured into 25 mL of water and filtered to obtain the crude products, which were purified by column chromatography (petroleum ether/EtOAc = 5:1) to afford product **3** with 70–93% yield. The products were further identified by FTIR, NMR and HRMS, being in good agreement with the assigned structures.

### Spectroscopic Data of Polyhalo 2-Aryl-4-aminoquinazolines 3

#### **4-Amino-5,7,8-trifluoro-2-(4-(trifluoromethyl)phenyl)quinazoline-6-carbonitrile (3a)**

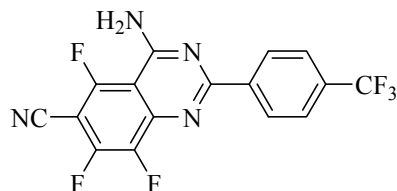

Slight yellow solid, mp: 224–225°C. IR (KBr): 3494, 3388, 2243, 1639, 1554, 1464, 1317, 1134, 930  $\text{cm}^{-1}$ .  $^1\text{H}$  NMR (500 MHz,  $\text{DMSO-}d_6$ ):  $\delta$  7.85 (d,  $J = 8.3$  Hz, 2H, ArH), 8.16 (br, 1H,  $\text{NH}_2$ ), 8.48 (d,  $J = 8.3$  Hz, 2H, PhH), 8.90 (br, 1H,  $\text{NH}_2$ ).  $^{13}\text{C}$  NMR (125 MHz,  $\text{DMSO-}d_6$ ):  $\delta$  162.4, 159.3, 158.0 (d,  $J = 267.5$  Hz), 150.5, 146.3, 141.6, 140.5, 131.3–131.8 (m), 129.3, 125.7, 123.4, 109.3, 101.1 (d,  $J = 11.3$  Hz), 87.6 (d,  $J = 18.8$  Hz).  $^{19}\text{F}$  NMR (470 MHz,  $\text{DMSO-}d_6$ ):  $\delta$  -61.3 (s, 3F), -103.4 (s, 1F), -129.2 (d,  $J = 18.8$  Hz, 1F), -153.3 (d,  $J = 14.1$  Hz, 1F). HRMS (TOF  $\text{ES}^-$ ):  $m/z$  calcd for  $\text{C}_{16}\text{H}_5\text{F}_6\text{N}_4$  [(M- $\text{H}^+$ )], 367.0424; found, 367.0427.

#### **4-Amino-8-chloro-5,7-difluoro-2-(4-(trifluoromethyl)phenyl)quinazoline-6-carbonitrile (3b)**

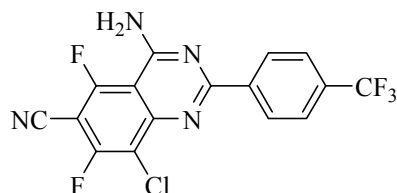

Slight yellow solid, mp: 220–221°C. IR (KBr): 3503, 3401, 2239, 1631, 1554, 1444, 1321, 1134, 738  $\text{cm}^{-1}$ .  $^1\text{H}$  NMR (500 MHz,  $\text{DMSO-}d_6$ ):  $\delta$  7.87 (d,  $J = 7.3$  Hz, 2H, PhH), 8.03 (br, 1H,  $\text{NH}_2$ ), 8.52 (d,  $J = 7.3$  Hz, 2H, PhH), 8.93 (br, 1H,  $\text{NH}_2$ ).  $^{13}\text{C}$  NMR (125 MHz,  $\text{DMSO-}d_6$ ):  $\delta$  162.4 (d,  $J = 50.0$  Hz), 160.0, 159.2, 157.1, 152.3, 140.6, 131.8 (t,  $J = 31.3$  Hz), 129.3, 127.7, 127.7, 125.7, 123.4, 109.4, 101.3, 88.2. HRMS (TOF  $\text{ES}^-$ ):  $m/z$  calcd for  $\text{C}_{16}\text{H}_5\text{ClF}_5\text{N}_4$  [(M- $\text{H}^+$ )], 383.0128; found, 383.0130.

#### **4-Amino-8-chloro-5,7-difluoro-2-(pyridin-4-yl)quinazoline-6-carbonitrile (3c)**

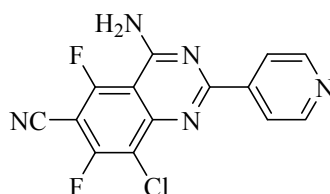

Slight yellow solid, mp: 275–276°C. IR (KBr): 3447, 2922, 2235, 1625, 1531, 1452, 1337, 1207, 738  $\text{cm}^{-1}$ .  $^1\text{H}$  NMR (500 MHz,  $\text{DMSO-}d_6$ ):  $\delta$  8.27 (d,  $J = 20.3$  Hz, 2H,  $\text{NH}_2$ ), 8.82 (s, 2H,

PhH), 9.06 (s, 2H, PhH).  $^{13}\text{C}$  NMR (125 MHz, DMSO- $d_6$ ):  $\delta$  162.4 (d,  $J = 27.5$  Hz), 160.3, 159.4, 157.4, 152.4, 150.7, 144.4, 128.4, 122.5, 109.5, 101.7 (d,  $J = 11.25$  Hz), 88.7. HRMS (TOF ES $^-$ ):  $m/z$  calcd for  $\text{C}_{14}\text{H}_5\text{ClF}_2\text{N}_5$  [(M-H $^+$ )], 316.0207; found, 316.0210.

#### 4-Amino-2-(4-chlorophenyl)-5,7,8-trifluoroquinazoline-6-carbonitrile (3d)

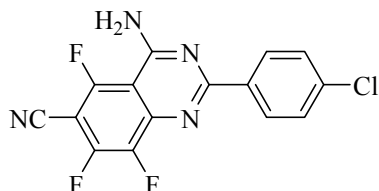

White solid, mp: 235–236°C. IR (KBr): 3457, 3403, 2239, 1623, 1547, 1461, 1349, 1092, 747  $\text{cm}^{-1}$ .  $^1\text{H}$  NMR (500 MHz, DMSO- $d_6$ ):  $\delta$  7.57 (s, 2H, PhH), 8.35 (s, 2H, PhH), 8.00 (t,  $J = 2.25$  Hz, 2H, NH $_2$ ).  $^{13}\text{C}$  NMR (125 MHz, DMSO- $d_6$ ):  $\delta$  163.0, 159.4, 157.1, 150.7, 146.6, 141.6, 137.1, 135.8, 130.6, 129.0, 109.5, 101.1, 86.9.  $^{19}\text{F}$  NMR (470 MHz, DMSO- $d_6$ ):  $\delta$  -103.5 (d,  $J = 14.1$  Hz, 1F), -129.5 (d,  $J = 18.8$  Hz, 1F), -153.7 (t,  $J = 18.8$  Hz, 1F). HRMS (TOF ES $^-$ ):  $m/z$  calcd for  $\text{C}_{15}\text{H}_5\text{ClF}_3\text{N}_4$  [(M-H $^+$ )], 333.0160; found, 333.0157.

#### 4-Amino-8-chloro-2-(4-chlorophenyl)-5,7-difluoroquinazoline-6-carbonitrile (3e)

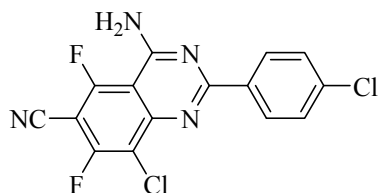

Slight yellow solid, mp: 240–241°C. IR (KBr): 3467, 3397, 2231, 1618, 1537, 1399, 1330, 1088, 673  $\text{cm}^{-1}$ .  $^1\text{H}$  NMR (500 MHz, DMSO- $d_6$ ):  $\delta$  7.60 (s, 2H, PhH), 8.43 (s, 2H, PhH), 7.96 (d,  $J = 8.7$  Hz, 2H, NH $_2$ ).  $^{13}\text{C}$  NMR (125 MHz, DMSO- $d_6$ ):  $\delta$  163.3, 160.3 (d,  $J = 37.5$  Hz), 157.1, 152.3, 137.1, 135.6 (t,  $J = 18.8$  Hz), 130.5 (t,  $J = 11.3$  Hz), 132.1, 129.0, 126.9, 111.8, 102.9, 97.0. HRMS (TOF ES $^-$ ):  $m/z$  calcd for  $\text{C}_{15}\text{H}_5\text{Cl}_2\text{F}_2\text{N}_4$  [(M-H $^+$ )], 348.9865; found, 348.9869.

#### 4-Amino-5,7,8-trichloro-2-(4-chlorophenyl)quinazoline-6-carbonitrile (3f)

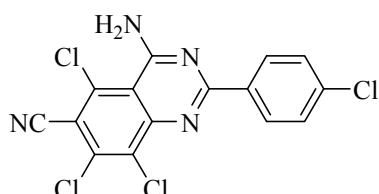

Slight yellow solid, mp: 275–276°C. IR (KBr): 3441, 3387, 2231, 1618, 1533, 1407, 1321, 1090, 755  $\text{cm}^{-1}$ .  $^1\text{H}$  NMR (500 MHz, DMSO- $d_6$ ):  $\delta$  7.62 (d,  $J = 8.2$  Hz, 2H, PhH), 8.44 (d,  $J = 7.9$ , 2H, PhH), 8.24 (br, 2H, NH $_2$ ).  $^{13}\text{C}$  NMR (125 MHz, DMSO- $d_6$ ):  $\delta$  169.1, 161.09 (d,  $J = 50.0$  Hz), 152.2, 141.4, 139.6, 137.1, 136.2, 135.6 (d,  $J = 12.5$  Hz), 130.6, 129.1, 114.3, 110.8

(d,  $J = 62.5$  Hz), 105.6. HRMS (TOF ES<sup>-</sup>):  $m/z$  calcd for C<sub>15</sub>H<sub>5</sub>Cl<sub>4</sub>N<sub>4</sub> [(M-H<sup>+</sup>)], 379.9196; found, 379.9193.

#### 4-Amino-5,7,8-trifluoro-2-phenylquinazoline-6-carbonitrile (3g)

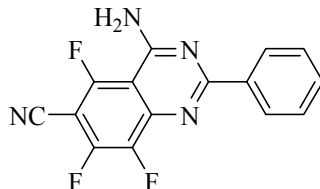

Yellow solid, mp: 220–221°C. IR (KBr): 3507, 3347, 2235, 1618, 1548, 1468, 1352, 1109, 699 cm<sup>-1</sup>. <sup>1</sup>H NMR (500 MHz, DMSO-*d*<sub>6</sub>):  $\delta$  7.52 (s, 3H, PhH), 8.40 (s, 2H, PhH), 7.89 (br, 2H, NH<sub>2</sub>). <sup>13</sup>C NMR (125 MHz, DMSO-*d*<sub>6</sub>):  $\delta$  163.9, 159.3, 157.1, 152.1, 150.5, 148.4, 146.7, 141.6, 139.6, 136.9, 131.9 (d,  $J = 65.0$  Hz), 128.4 (t,  $J = 86.3$  Hz) 109.5, 100.9, 87.0. <sup>19</sup>F NMR (470 MHz, DMSO-*d*<sub>6</sub>):  $\delta$  -103.5 (s, 1F), -129.8 (d,  $J = 18.8$  Hz, 1F), -153.8 (d,  $J = 18.8$  Hz, 1F). HRMS (TOF ES<sup>-</sup>):  $m/z$  calcd for C<sub>15</sub>H<sub>6</sub>F<sub>3</sub>N<sub>4</sub> [(M-H<sup>+</sup>)], 299.0550; found, 299.0553.

#### 4-Amino-8-chloro-5,7-difluoro-2-phenylquinazoline-6-carbonitrile (3h)

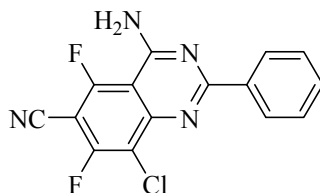

Slight yellow solid, mp: 224–225°C. IR (KBr): 3500, 3343, 2239, 1633, 1550, 1446, 1351, 1207, 690 cm<sup>-1</sup>. <sup>1</sup>H NMR (500 MHz, DMSO-*d*<sub>6</sub>):  $\delta$  7.50–7.56 (m, 3H, PhH), 8.41 (d,  $J = 7.1$  Hz, 2H, PhH), 7.91 (br, 2H, NH<sub>2</sub>). <sup>13</sup>C NMR (125 MHz, DMSO-*d*<sub>6</sub>):  $\delta$  171.2, 164.5, 162.8, 159.6–160.6, 157.6, 153.0, 137.31, 132.5 (d,  $J = 26.25$  Hz), 129.2 (d,  $J = 15.0$  Hz), 113.6 (d,  $J = 11.3$  Hz), 110.0, 101.5 (d,  $J = 8.8$  Hz), 88.1 (t,  $J = 22.5$  Hz). HRMS (TOF ES<sup>-</sup>):  $m/z$  calcd for C<sub>15</sub>H<sub>6</sub>ClF<sub>2</sub>N<sub>4</sub> [(M-H<sup>+</sup>)], 315.0255; found, 315.0254.

#### 4-Amino-5,7,8-trichloro-2-phenylquinazoline-6-carbonitrile (3i)

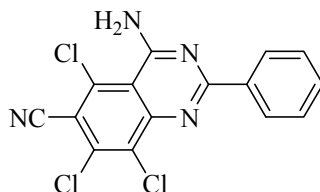

Slight yellow solid, mp: 273–274°C. IR (KBr): 3503, 3380, 2227, 1611, 1537, 1452, 1395, 1207, 683 cm<sup>-1</sup>. <sup>1</sup>H NMR (500 MHz, DMSO-*d*<sub>6</sub>):  $\delta$  7.68 (s, 3H, PhH), 8.40 (d,  $J = 8.6$  Hz, 2H, PhH), 7.91 (d,  $J = 8.7$ , 2H, NH<sub>2</sub>). <sup>13</sup>C NMR (125 MHz, DMSO-*d*<sub>6</sub>):  $\delta$  180.0, 163.2, 161.7, 152.3, 141.6, 139.6, 136.8, 132.1, 128.9, 114.4, 110.3–111.0 (d,  $J = 78.75$  Hz), 105.5. HRMS (TOF ES<sup>-</sup>):  $m/z$  calcd for C<sub>15</sub>H<sub>6</sub>Cl<sub>3</sub>N<sub>4</sub> [(M-H<sup>+</sup>)], 346.9664; found, 346.9662.

#### 4-Amino-5,7,8-trifluoro-2-p-tolylquinazoline-6-carbonitrile (3j)

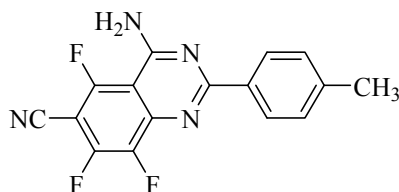

Slight yellow solid, mp: 245–246°C. IR (KBr): 3400, 2924, 2239, 1635, 1556, 1413, 1353, 1090, 745  $\text{cm}^{-1}$ .  $^1\text{H}$  NMR (500 MHz,  $\text{DMSO-}d_6$ ):  $\delta$  7.33 (s, 2H, PhH), 8.32 (s, 2H, PhH), 7.83 (br, 2H,  $\text{NH}_2$ ), 2.46 (d,  $J = 55.5$  Hz, 3H,  $\text{CH}_3$ ).  $^{13}\text{C}$  NMR (125 MHz,  $\text{DMSO-}d_6$ ):  $\delta$  164.1, 159.4 (d,  $J = 18.8$  Hz), 157.2, 148.5, 146.8, 134.3, 129.7 (d,  $J = 47.5$  Hz), 128.8 (d,  $J = 40.0$  Hz), 109.6, 100.9, 88.6, 21.5. HRMS (TOF  $\text{ES}^-$ ):  $m/z$  calcd for  $\text{C}_{16}\text{H}_8\text{F}_3\text{N}_4$  [(M-H $^+$ )], 313.0707; found, 313.0706.

#### 4-Amino-8-chloro-5,7-difluoro-2-p-tolylquinazoline-6-carbonitrile (3k)

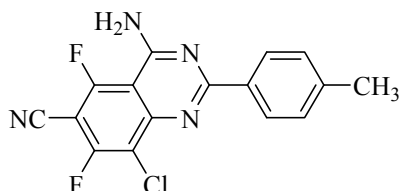

Slight yellow solid, mp: 250–251°C. IR (KBr): 3480, 3060, 2235, 1638, 1557, 1460, 1321, 1089, 726  $\text{cm}^{-1}$ .  $^1\text{H}$  NMR (500 MHz,  $\text{DMSO-}d_6$ ):  $\delta$  7.34 (s, 2H, PhH), 8.37 (s, 2H, PhH), 7.87 (br, 2H,  $\text{NH}_2$ ), 2.45 (d,  $J = 51.0$  Hz,  $\text{CH}_3$ ).  $^{13}\text{C}$  NMR (125 MHz,  $\text{DMSO-}d_6$ ):  $\delta$  164.2, 162.3, 160.1 (d,  $J = 41.3$  Hz), 157.1, 152.7, 142.3, 134.2, 129.5, 128.9 (d,  $J = 31.3$  Hz), 124.2, 109.7, 101.1, 87.4, 21.5. HRMS (TOF  $\text{ES}^-$ ):  $m/z$  calcd for  $\text{C}_{16}\text{H}_8\text{ClF}_2\text{N}_4$  [(M-H $^+$ )], 329.0411; found, 329.0413.

#### 4-Amino-5,7,8-trifluoro-2-methylquinazoline-6-carbonitrile (3l)

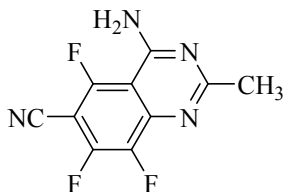

Slight yellow solid, mp: 229–231°C. IR (KBr): 3433, 3123, 2243, 1652, 1554, 1407, 1334, 1019, 787  $\text{cm}^{-1}$ .  $^1\text{H}$  NMR (500 MHz,  $\text{DMSO-}d_6$ ):  $\delta$  7.84 (br, 2H,  $\text{NH}_2$ ), 2.48 (d,  $J = 31.4$  Hz, 3H,  $\text{CH}_3$ ).  $^{13}\text{C}$  NMR (125 MHz,  $\text{DMSO-}d_6$ ):  $\delta$  169.4, 159.0 (d,  $J = 55.0$  Hz), 151.7, 150.1, 148.1, 146.2, 141.0, 109.4, 100.2, 88.7, 26.4. HRMS (TOF  $\text{ES}^-$ ):  $m/z$  calcd for  $\text{C}_{10}\text{H}_4\text{F}_3\text{N}_4$  [(M-H $^+$ )], 237.0394; found, 237.0396.

#### 4-Amino-8-chloro-5,7-difluoro-2-methylquinazoline-6-carbonitrile (3m)

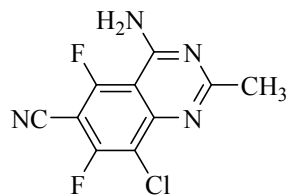

Slight yellow solid, mp: 222–223°C. IR (KBr): 3446, 3128, 2239, 1627, 1558, 1403, 1330, 1199, 828  $\text{cm}^{-1}$ .  $^1\text{H}$  NMR (500 MHz,  $\text{DMSO-}d_6$ ):  $\delta$  7.72 (br, 2H,  $\text{NH}_2$ ), 2.49 (d,  $J = 19.9$  Hz, 3H,  $\text{CH}_3$ ).  $^{13}\text{C}$  NMR (125 MHz,  $\text{DMSO-}d_6$ ):  $\delta$  170.0, 168.8, 160.3, 159.4 (t,  $J = 27.5$  Hz), 157.0, 152.2, 112.3, 109.5, 100.5 (d,  $J = 10.0$  Hz), 87.5 (d,  $J = 20.0$  Hz). HRMS (TOF ES $^-$ ):  $m/z$  calcd for  $\text{C}_{10}\text{H}_4\text{ClF}_2\text{N}_4$  [(M-H $^+$ )], 253.0098; found, 253.0097.

#### 4-Amino-5,7,8-trichloro-2-methylquinazoline-6-carbonitrile (3n)

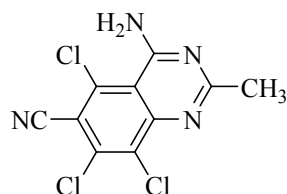

Slight yellow solid, mp: 249–250°C. IR (KBr): 3464, 2231, 1652, 1539, 1407, 1305, 1041, 730  $\text{cm}^{-1}$ .  $^1\text{H}$  NMR (500 MHz,  $\text{DMSO-}d_6$ ):  $\delta$  8.00 (br, 2H,  $\text{NH}_2$ ), 2.50 (d,  $J = 9.9$  Hz, 3H,  $\text{CH}_3$ ).  $^{13}\text{C}$  NMR (125 MHz,  $\text{DMSO-}d_6$ ):  $\delta$  168.7, 161.2, 151.9, 139.4, 135.7 (d,  $J = 38.8$  Hz), 130.0, 114.2, 110.2, 103.8, 26.3. HRMS (TOF ES $^-$ ):  $m/z$  calcd for  $\text{C}_{10}\text{H}_4\text{Cl}_3\text{N}_4$  [(M-H) $^-$ ], 284.9507; found, 284.9510.



### General Procedure for the Preparation of Polyhalo 3-Aminoindazoles 5 and 7

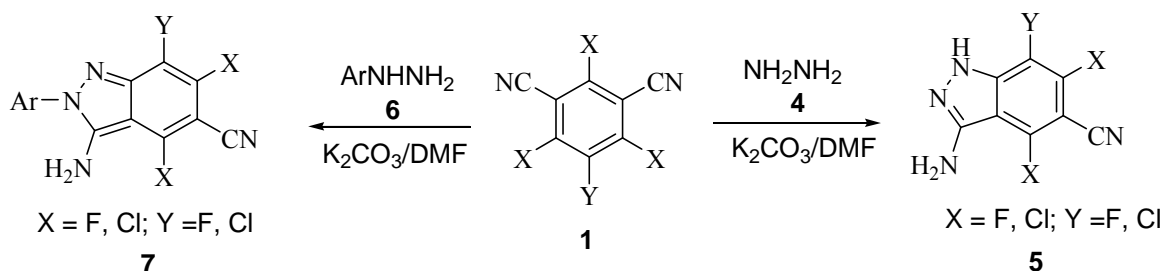

A 25 mL round-bottom flask was charged with isophthalonitrile derivatives **1** (2 mmol), DMF (10 mL) and  $K_2CO_3$  (6 mmol). The solution was cooled to 0 °C by ice bath. The hydrazine hydrate **4** or phenylhydrazine **6** (2.4 mmol) was added. After a few minutes, the resulting solution was stirred for 4 h at room temperature until the isophthalonitrile derivatives **1** was completely consumed. The reaction mixture was poured into 25 mL of ice water and filtered to obtain the crude products, which were purified by column chromatography (petroleum ether/EtOAc = 2:1) to afford product **5** or **7** with 70–87% yield. The products were further identified by FTIR, NMR and HRMS, being in good agreement with the assigned structures.

### Spectroscopic Data of Polyhalo 3-Aminoindazoles 5 and 7

#### **3-Amino-4,6,7-trifluoro-1H-indazole-5-carbonitrile (5a)**

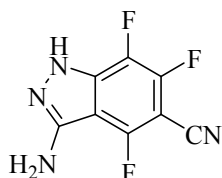

Slight yellow solid, mp: 193–194°C.  $^1H$  NMR (500 MHz,  $DMSO-d_6$ ):  $\delta$  5.92 (br, 2H,  $NH_2$ ), 13.12 (br, 1H, NH).  $^{13}C$  NMR (125 MHz,  $DMSO-d_6$ ):  $\delta$  155.5, 153.4, 149.3, 133.8 (d,  $J = 20.0$  Hz), 131.1, 110.7, 102.6, 80.1. IR (KBr): 3499, 2239, 1648, 1574, 1521, 1395, 1268, 901, 820  $cm^{-1}$ . HRMS (TOF ES $^-$ ):  $m/z$  calcd for  $C_8H_2F_3N_4 [(M-H)^-]$ , 211.0237; found, 211.0239.

#### **3-Amino-7-chloro-4,6-difluoro-1H-indazole-5-carbonitrile (5b)**

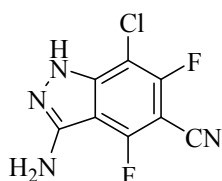

Deep yellow solid, mp: 225–226°C. IR (KBr): 3494, 2239, 1634, 1436, 1326, 1220, 901, 791

$\text{cm}^{-1}$ .  $^1\text{H}$  NMR (500 MHz,  $\text{DMSO-}d_6$ ):  $\delta$  5.93 (br, 2H,  $\text{NH}_2$ ), 13.07 (br, 1H, NH).  $^{13}\text{C}$  NMR (125 MHz,  $\text{DMSO-}d_6$ ):  $\delta$  158.3, 156.1, 149.6, 141.5, 110.6, 101.2, 97.7, 81.0. HRMS (TOF ES $^-$ ):  $m/z$  calcd for  $\text{C}_8\text{H}_2\text{ClF}_2\text{N}_4$  [(M-H $^+$ )], 226.9942; found, 226.9942.

### 3-Amino-4,6,7-trichloro-1H-indazole-5-carbonitrile (5c)

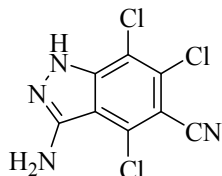

Slight yellow solid, mp: 229–230°C. IR (KBr): 3458, 1603, 1399, 1325, 1183, 1048, 673  $\text{cm}^{-1}$ .  $^1\text{H}$  NMR (500 MHz,  $\text{DMSO-}d_6$ ):  $\delta$  5.83 (br, 2H,  $\text{NH}_2$ ), 13.09 (br, 1H, NH).  $^{13}\text{C}$  NMR (125 MHz,  $\text{DMSO-}d_6$ ):  $\delta$  150.7, 140.5 (d,  $J = 52.5$  Hz), 132.3, 130.0, 128.4, 114.5 (d,  $J = 90.0$  Hz), 110.9, 102.5. HRMS (TOF ES $^-$ ):  $m/z$  calcd for  $\text{C}_8\text{H}_2\text{Cl}_3\text{N}_4$  [(M-H $^+$ )], 258.9351, found; 258.9349.

### 3-Amino-2-(2,4-dinitrophenyl)-4,6,7-trifluoro-2H-indazole-5-carbonitrile (7a)

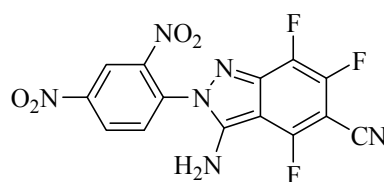

Deep yellow solid, mp: 208–209°C.  $^1\text{H}$  NMR (500 MHz,  $\text{DMSO-}d_6$ ):  $\delta$  7.51 (d,  $J = 9.4$ , 1H, PhH), 8.42 (d,  $J = 9.4$ , 1H, PhH), 8.98 (d,  $J = 36.3$ , 1H, PhH).  $^{13}\text{C}$  NMR (125 MHz,  $\text{DMSO-}d_6$ ):  $\delta$  164.2, 162.1, 148.8 (d,  $J = 2.5$  Hz), 140.6 (d,  $J = 13.8$  Hz), 138.9, 136.5, 131.4 (d,  $J = 32.5$  Hz), 124.0 (d,  $J = 26.3$  Hz), 116.5, 111.2 (d,  $J = 28.8$  Hz), 101.5, 77.6 (t,  $J = 20.0$  Hz). IR (KBr): 3319, 2231, 1656, 1509, 1342, 1138, 742  $\text{cm}^{-1}$ . HRMS (TOF ES $^-$ ):  $m/z$  calcd for  $\text{C}_{14}\text{H}_6\text{F}_3\text{N}_6\text{O}_4$  [(M-H $^+$ )], 377.0252; found, 377.0250.

### 3-Amino-7-chloro-2-(2,4-dinitrophenyl)-4,6-difluoro-2H-indazole-5-carbonitrile (7b)

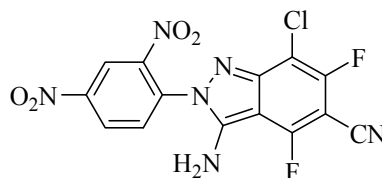

Deep yellow solid, mp: 208–209°C. IR (KBr): 3472, 1639, 1537, 1354, 1081, 759  $\text{cm}^{-1}$ .  $^1\text{H}$  NMR (500 MHz,  $\text{DMSO-}d_6$ ):  $\delta$  7.32–7.62 (m, 5H, PhH).  $^{13}\text{C}$  NMR (125 MHz,  $\text{DMSO-}d_6$ ):  $\delta$  161.9 (d,  $J = 7.5$  Hz), 159.7 (d,  $J = 6.3$  Hz), 155.5, 153.6, 145.8, 144.6, 137.8, 130.2 (d,  $J = 77.5$  Hz), 125.9 (d,  $J = 66.3$  Hz), 111.5, 101.3 (d,  $J = 20.0$  Hz), 97.0 (d,  $J = 13.8$  Hz), 79.1. HRMS (TOF ES $^-$ ):  $m/z$  calcd for  $\text{C}_{14}\text{H}_4\text{ClF}_2\text{N}_6\text{O}_4$  [(M-H $^+$ )], 392.9956; found, 392.9955.

### 3-Amino-4,6,7-trifluoro-2-(4-nitrophenyl)-2H-indazole-5-carbonitrile (7c)

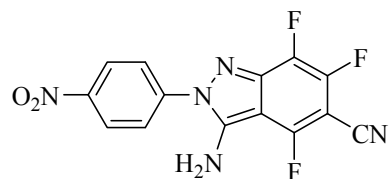

Yellow solid, mp: 227–228°C.  $^1\text{H}$  NMR (500 MHz,  $\text{DMSO-}d_6$ ):  $\delta$  7.64–7.93 (m, 2H, PhH), 8.40 (d,  $J = \text{Hz}$ , 2H, PhH).  $^{13}\text{C}$  NMR (125 MHz,  $\text{DMSO-}d_6$ ):  $\delta$  158.6, 156.5, 147.0, 145.8, 144.1 (d,  $J = 111.3$  Hz), 110.8, 98.0 (d,  $J = 6.3$  Hz), 78.1 (t,  $J = 18.8$  Hz). IR (KBr): 3464, 2231, 1660, 1530, 1349, 1183, 1104, 667  $\text{cm}^{-1}$ . HRMS (TOF ES $^-$ ):  $m/z$  calcd for  $\text{C}_{14}\text{H}_5\text{F}_3\text{N}_5\text{O}_2$  [(M-H $^+$ )], 332.0401, found; 334.0405.

### 3-Amino-7-chloro-4,6-difluoro-2-(4-nitrophenyl)-2H-indazole-5-carbonitrile (7d)

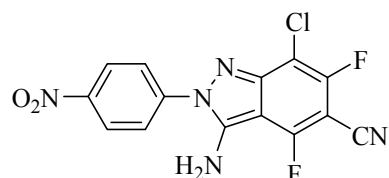

Yellow solid, mp: 227–228°C.  $^1\text{H}$  NMR (500 MHz,  $\text{DMSO-}d_6$ ):  $\delta$  7.68–7.92 (m, 2H, PhH), 8.39 (d,  $J = 8.6$  Hz, 2H, PhH).  $^{13}\text{C}$  NMR (125 MHz,  $\text{DMSO-}d_6$ ):  $\delta$  161.5, 159.3, 155.4, 153.4, 145.9 (d,  $J = 138.8$  Hz), 142.5, 125.8 (d,  $J = 118.8$  Hz), 110.8, 100.8 (d,  $J = 20.0$  Hz), 96.6 (d,  $J = 12.5$  Hz), 79.1 (d,  $J = 16.3$  Hz). IR (KBr): 3429, 2227, 1639, 1529, 1399, 1342, 1089, 669  $\text{cm}^{-1}$ . HRMS (TOF ES $^-$ ):  $m/z$  calcd for  $\text{C}_{14}\text{H}_5\text{ClF}_2\text{N}_5\text{O}_2$  [(M-H $^+$ )], 348.0105; found, 348.0102.

### 3-Amino-4,6,7-trifluoro-2-phenyl-2H-indazole-5-carbonitrile (7e)

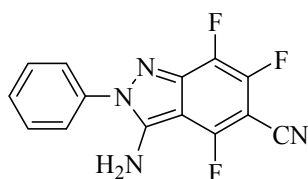

Yellow solid, mp: 246–247°C. IR (KBr): 3383, 2227, 1656, 1529, 1399, 1277, 1179, 763  $\text{cm}^{-1}$ .  $^1\text{H}$  NMR (500 MHz,  $\text{DMSO-}d_6$ ):  $\delta$  7.28–7.62 (m, 5H, PhH).  $^{13}\text{C}$  NMR (125 MHz,  $\text{DMSO-}d_6$ ):  $\delta$  158.5, 156.4, 145.3 (d,  $J = 10.0$  Hz), 143.6 (t,  $J = 12.5$  Hz), 139.7, 137.5 (d,  $J = 38.8$  Hz), 135.4 (d,  $J = 12.5$  Hz), 133.4 (d,  $J = 12.5$  Hz), 129.8, 125.7 (d,  $J = 35.0$  Hz), 111.1 (d,  $J = 35.0$  Hz), 97.8 (t,  $J = 6.3$  Hz), 77.6 (t,  $J = 20.0$  Hz).  $^{19}\text{F}$  NMR (470 MHz,  $\text{DMSO-}d_6$ ):  $\delta$  -109.8 (t,  $J = 9.4$  Hz, 1F), -141.8 (d,  $J = 14.1$  Hz, 1F), -162.1 (s, 1F). HRMS (TOF ES $^-$ ):  $m/z$  calcd for  $\text{C}_{14}\text{H}_6\text{F}_3\text{N}_4$  [(M-H $^+$ )], 287.0550; found, 287.0552.

### 3-Amino-7-chloro-4,6-difluoro-2-phenyl-2H-indazole-5-carbonitrile (7f)

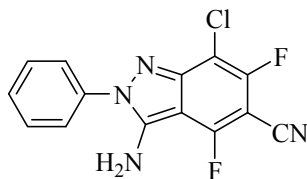

Slight green solid, mp: 221–222°C. IR (KBr): 3471, 2222, 1641, 1529, 1350, 1142, 608  $\text{cm}^{-1}$ .  $^1\text{H}$  NMR (500 MHz,  $\text{DMSO-}d_6$ ):  $\delta$  7.34–7.62 (m, 5H, PhH).  $^{13}\text{C}$  NMR (125 MHz,  $\text{DMSO-}d_6$ ):  $\delta$  161.3 (d,  $J = 7.5$  Hz), 159.2, 155.0, 153.1, 145.3, 144.1, 137.32, 129.7 (t,  $J = 76.3$  Hz), 129.4, 125.6, 111.1, 100.8 (d,  $J = 25.0$  Hz), 96.4 (d,  $J = 13.8$  Hz), 78.6 (t,  $J = 17.5$  Hz). HRMS (TOF ES $^-$ ):  $m/z$  calcd for  $\text{C}_{14}\text{H}_6\text{ClF}_2\text{N}_4$  [(M-H $^+$ )], 303.0255; found, 303.0255.

### 3-Amino-4,6,7-trichloro-2-phenyl-2H-indazole-5-carbonitrile (7g)

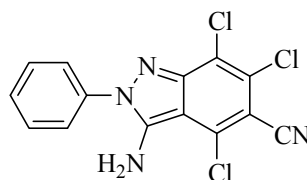

Yellow solid, mp: 227–228°C. IR (KBr): 3482, 2227, 1627, 1492, 1444, 1350, 1036, 722  $\text{cm}^{-1}$ .  $^1\text{H}$  NMR (500 MHz,  $\text{DMSO-}d_6$ ):  $\delta$  6.98 (s, 1H, PhH), 7.57–7.64 (d,  $J = 35$  Hz, 4H, PhH) ppm.  $^{13}\text{C}$  NMR (125 MHz,  $\text{DMSO-}d_6$ ):  $\delta$  159.2, 145.1 (d,  $J = 47.5$  Hz), 137.4, 135.4, 134.5, 129.8 (d,  $J = 12.5$  Hz), 128.6, 125.9, 122.1, 118.4, 115.1, 105.7, 100.3. HRMS (TOF ES $^-$ ):  $m/z$  calcd for  $\text{C}_{14}\text{H}_6\text{Cl}_3\text{N}_4$  [(M-H $^-$ )], 334.9664; found, 334.9668.

### $^1\text{H}$ NMR and $^{13}\text{C}$ NMR Spectra for Polyhalo 2-Aryl-4-aminoquinazolines 3

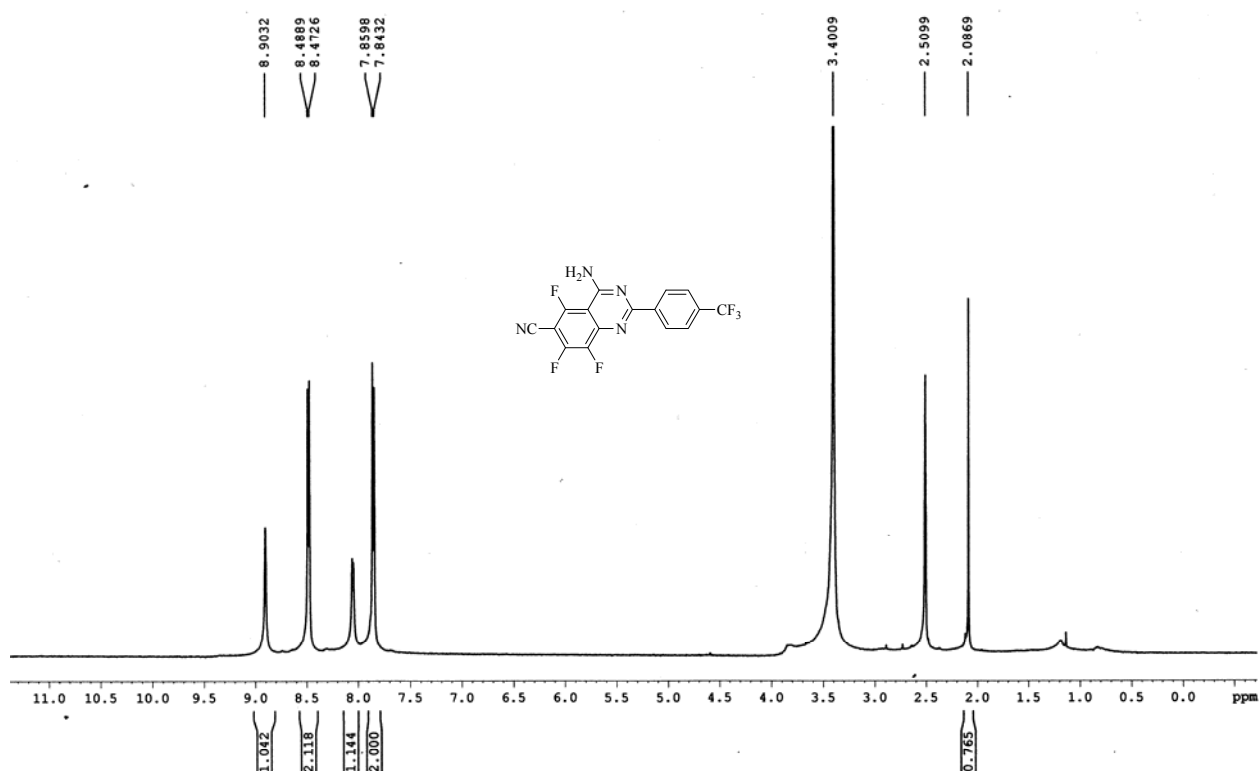

Figure 1.  $^1\text{H}$  NMR (500 MHz,  $\text{DMSO-}d_6$ ) spectra of compound 3a

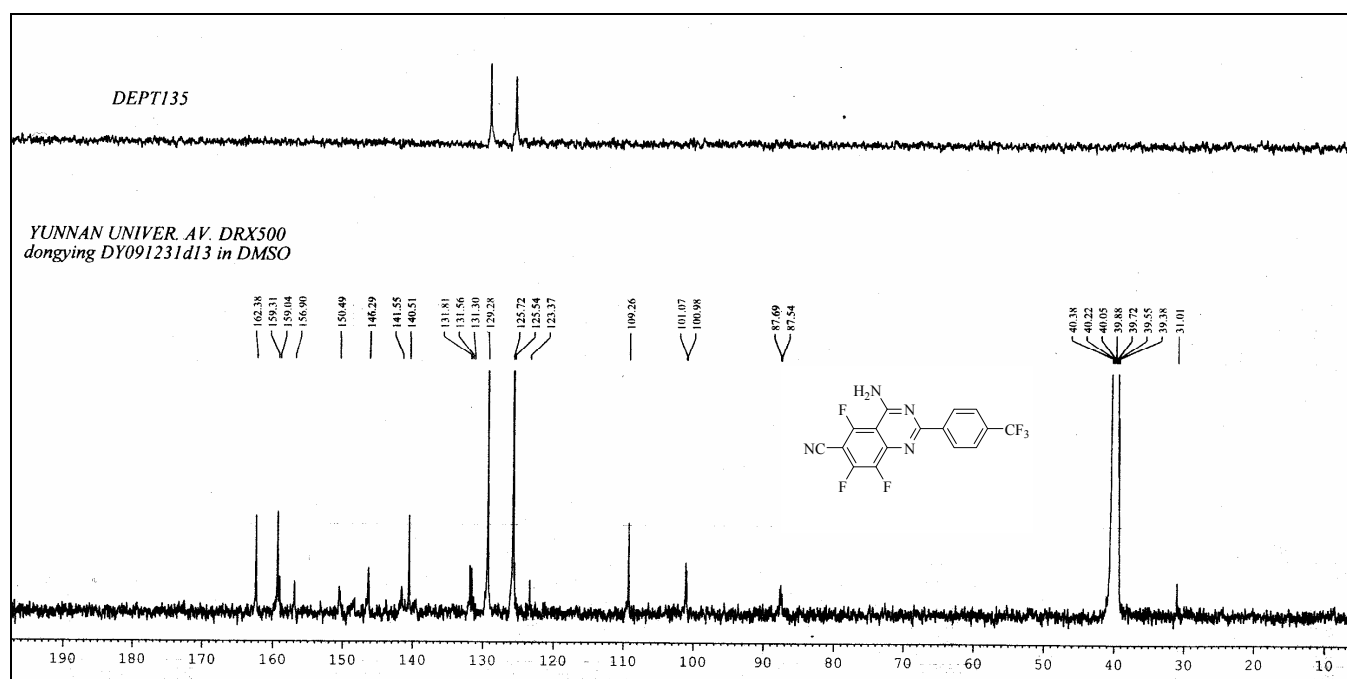

Figure 2.  $^{13}\text{C}$  NMR (125 MHz,  $\text{DMSO-}d_6$ ) spectra of compound 3a

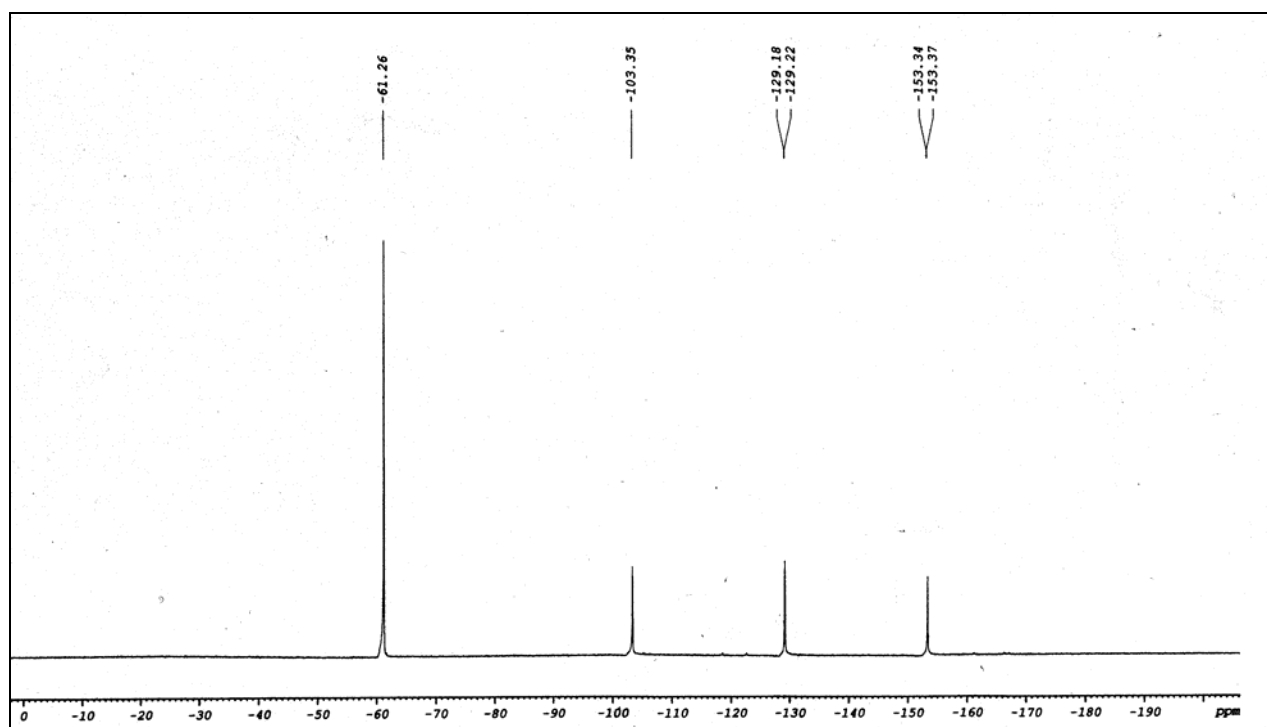

Figure 3.  $^{19}\text{F}$  NMR (470 MHz,  $\text{DMSO}-d_6$ ) spectra of compound **3a**

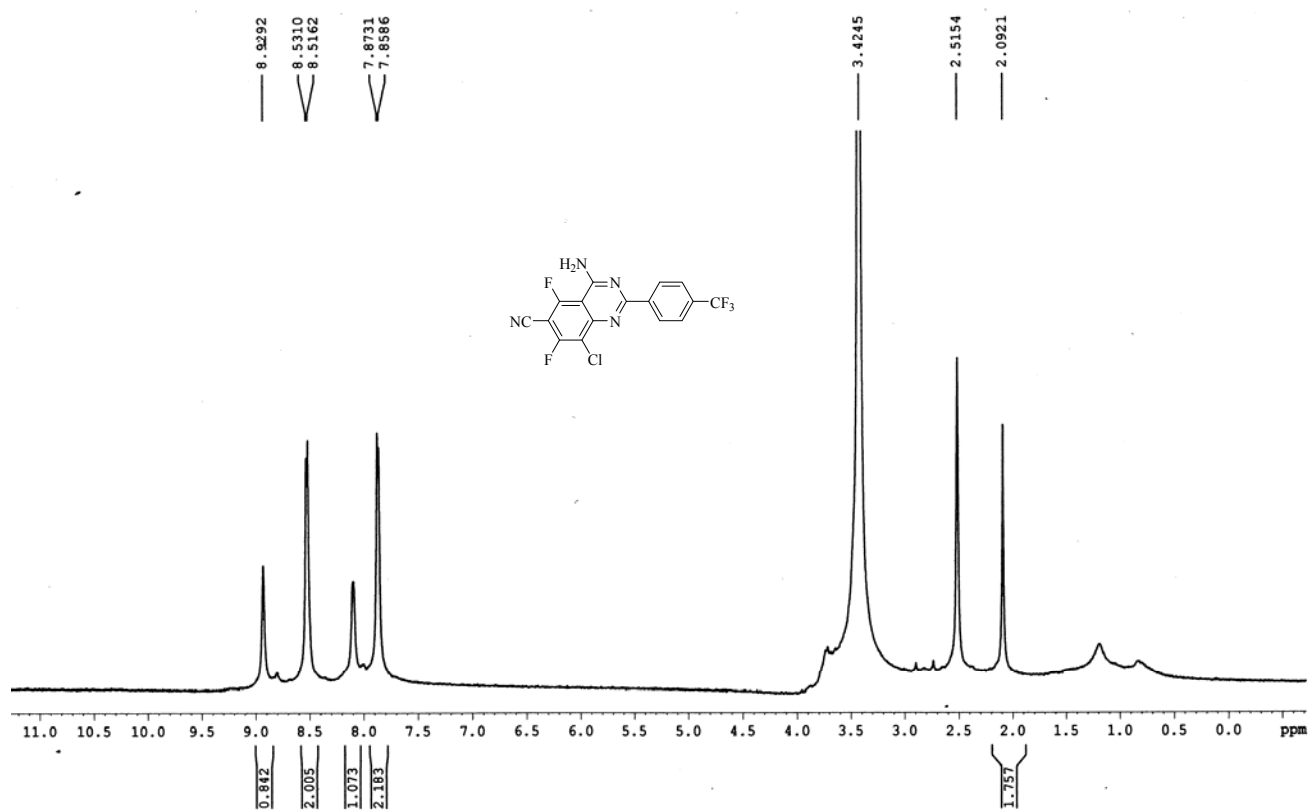

Figure 4.  $^1\text{H}$  NMR (500 MHz,  $\text{DMSO}-d_6$ ) spectra of compound **3b**

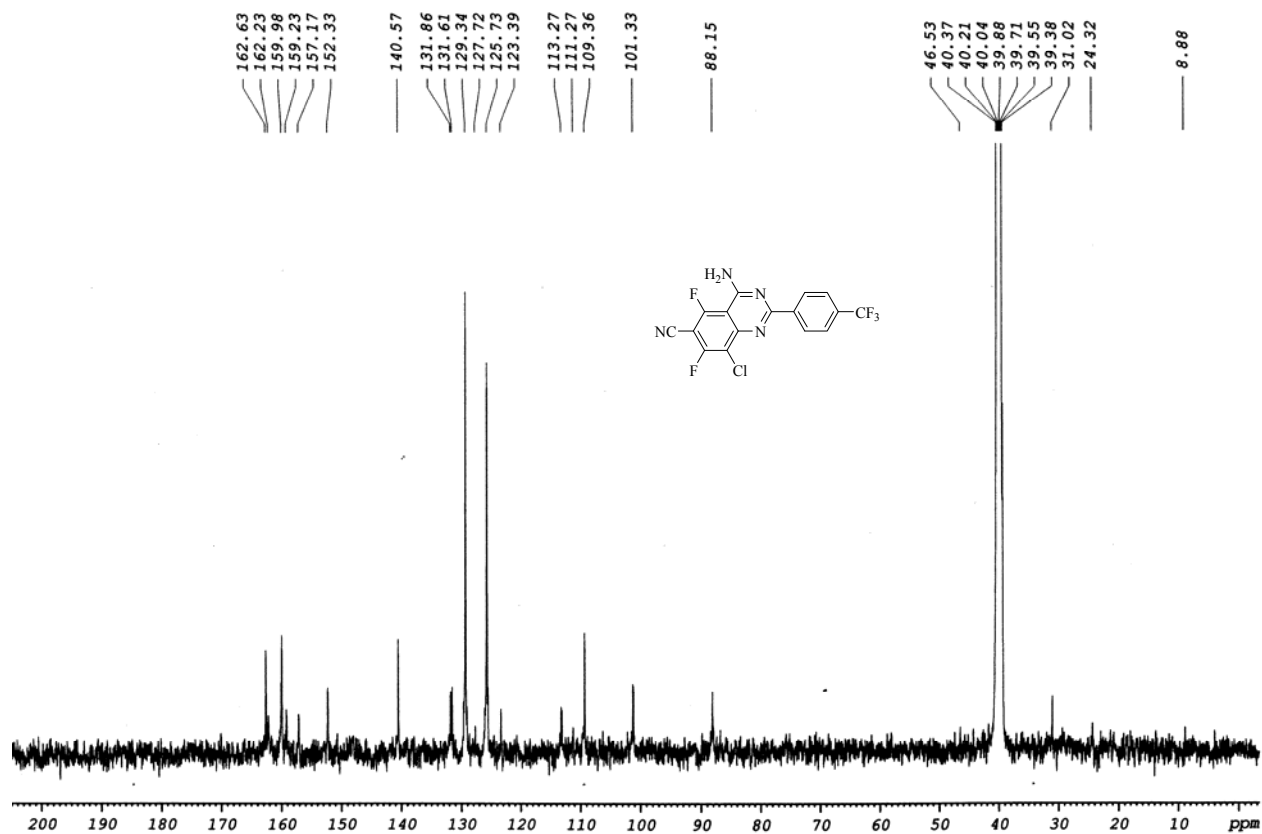

Figure 5. <sup>13</sup>C NMR (125 MHz, DMSO-*d*<sub>6</sub>) spectra of compound 3b

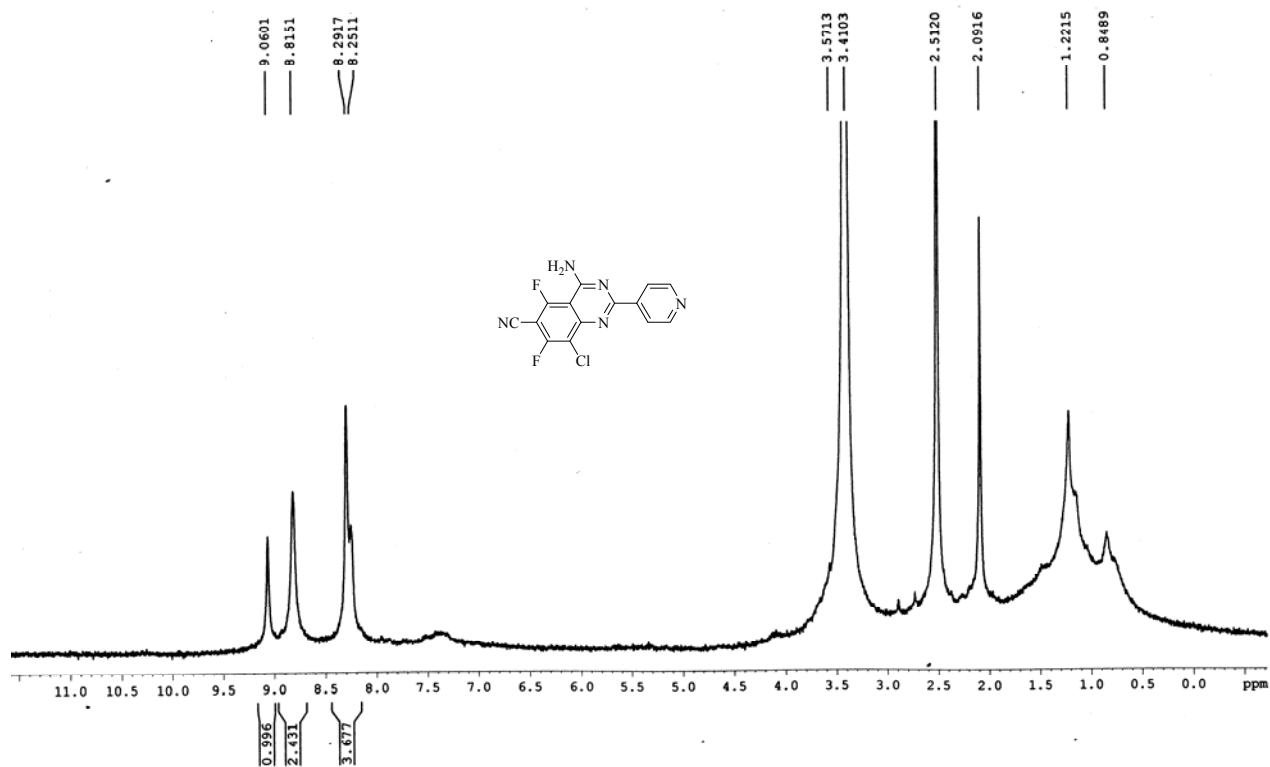

Figure 6. <sup>1</sup>H NMR (500 MHz, DMSO-*d*<sub>6</sub>) spectra of compound 3c

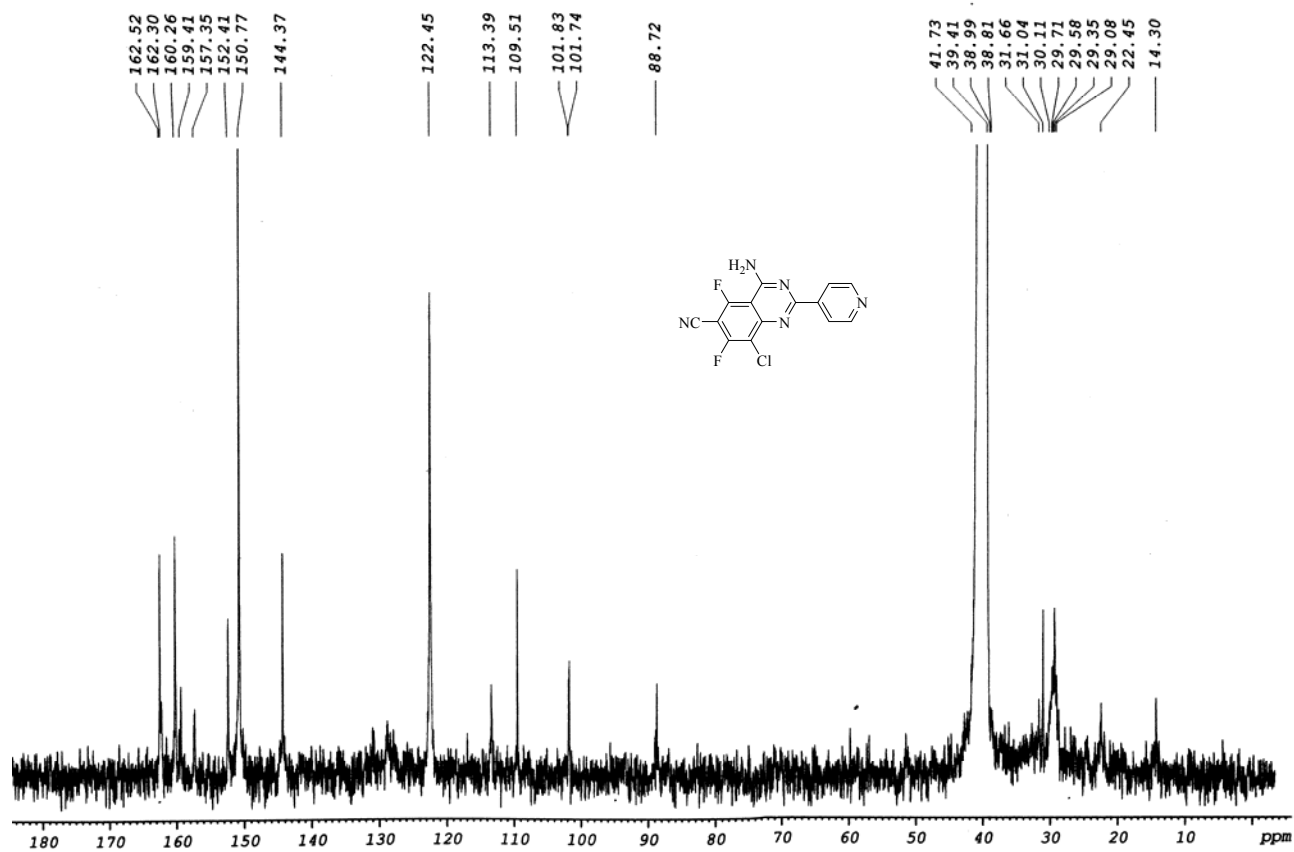

Figure 7. <sup>13</sup>C NMR (125 MHz, DMSO-*d*<sub>6</sub>) spectra of compound **3c**

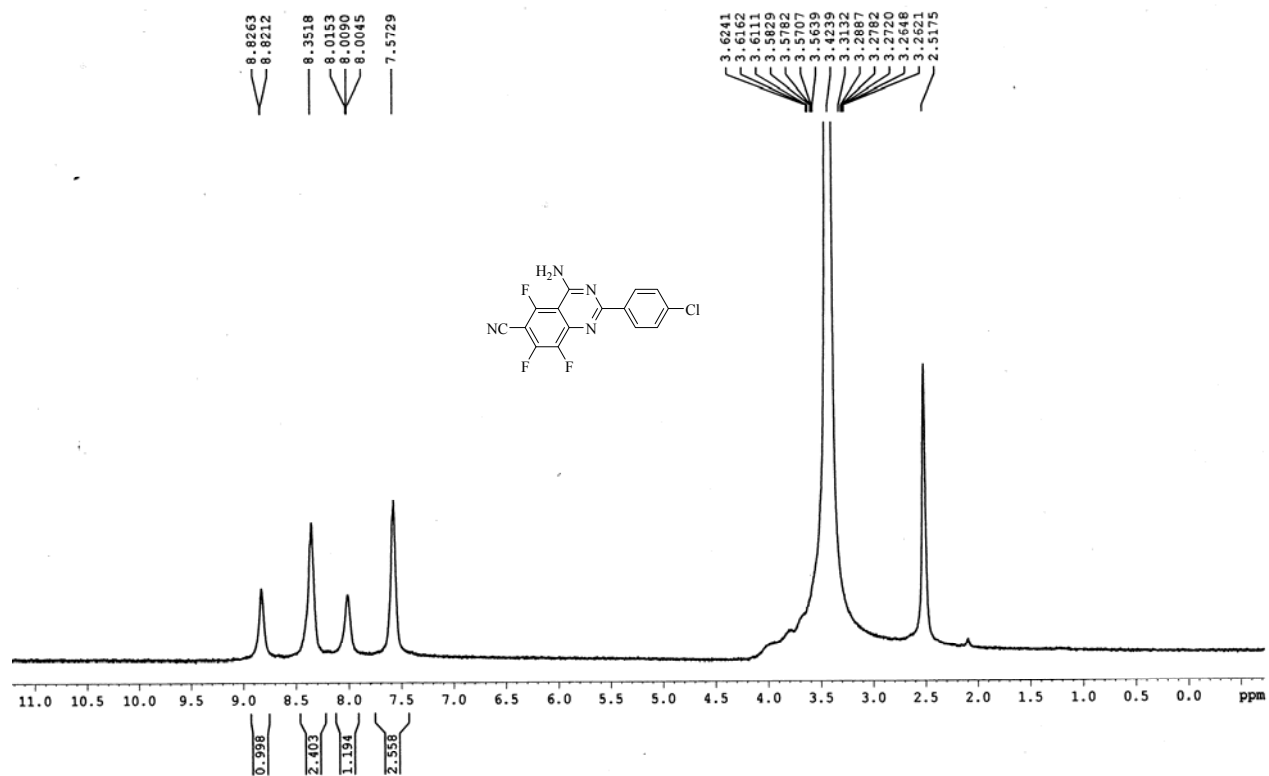

Figure 8. <sup>1</sup>H NMR (500 MHz, DMSO-*d*<sub>6</sub>) spectra of compound **3d**



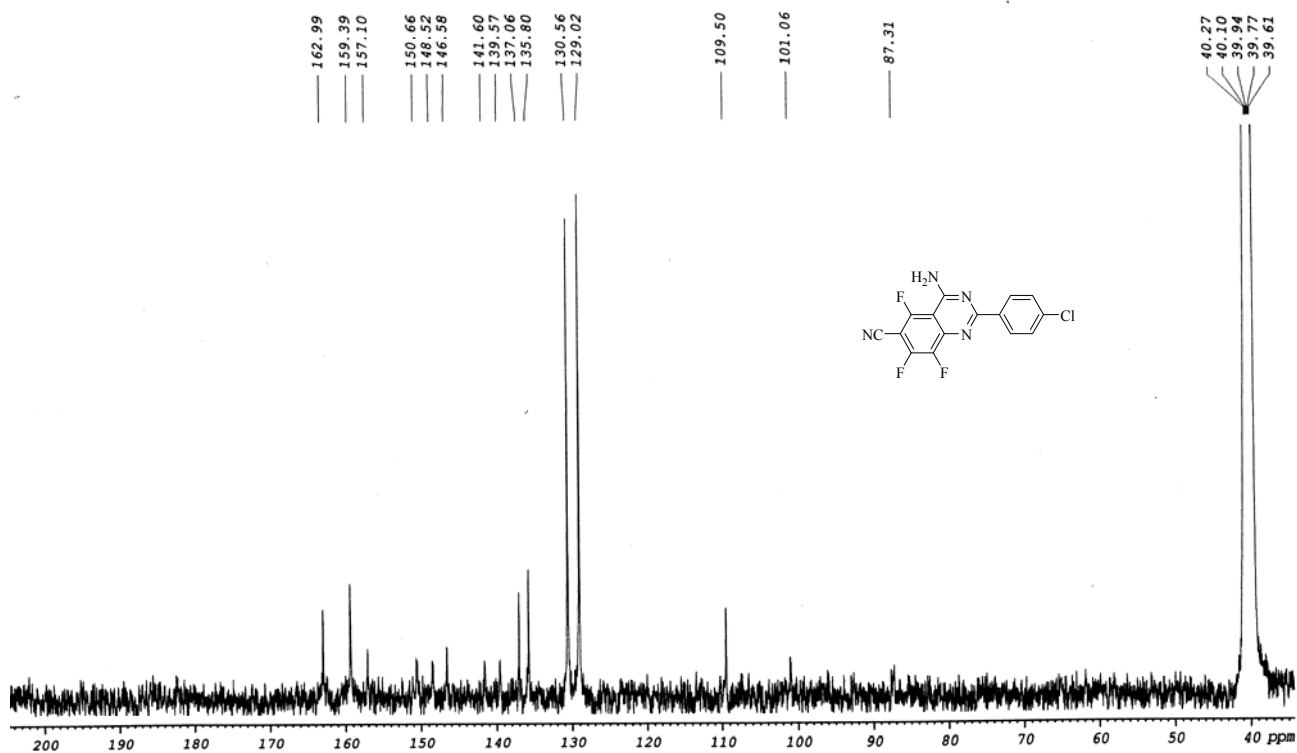

Figure 9.  $^{13}\text{C}$  NMR (125 MHz,  $\text{DMSO-}d_6$ ) spectra of compound 3d

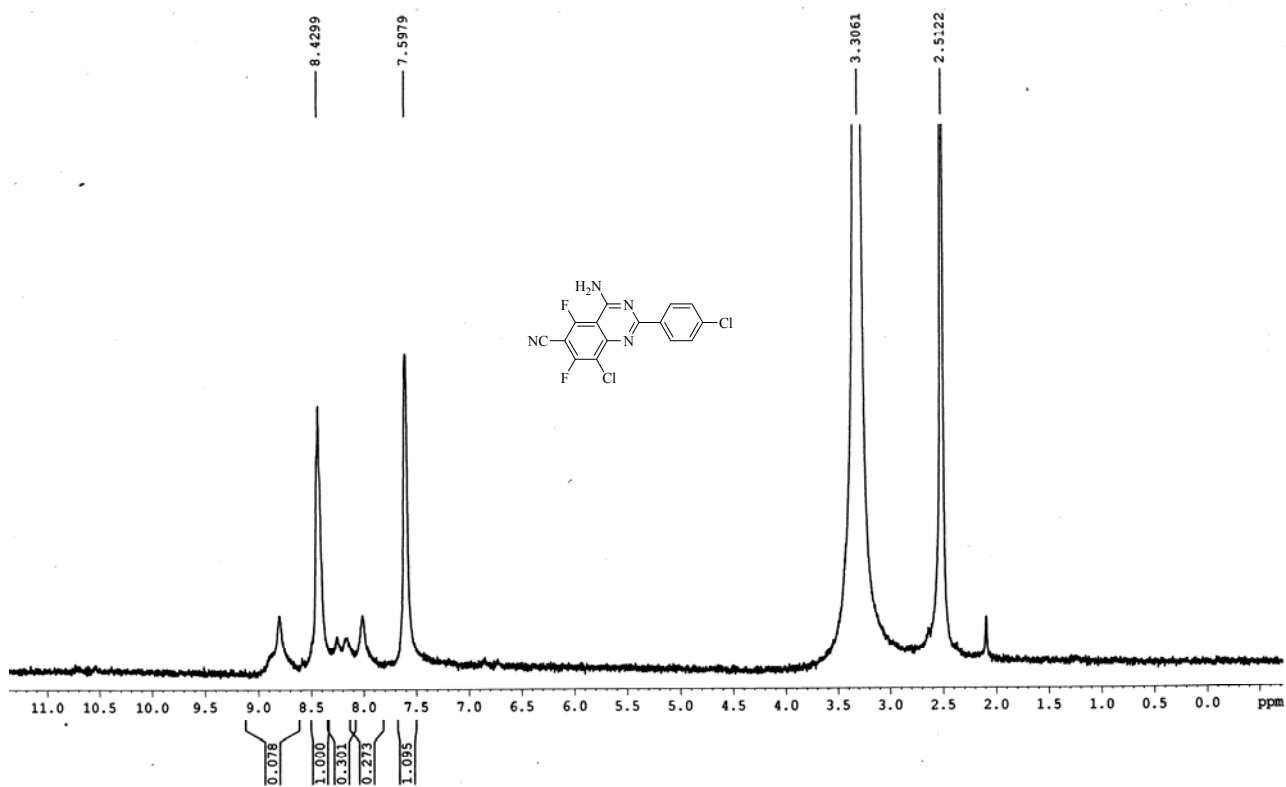

Figure 10.  $^1\text{H}$  NMR (500 MHz,  $\text{DMSO-}d_6$ ) spectra of compound 3e

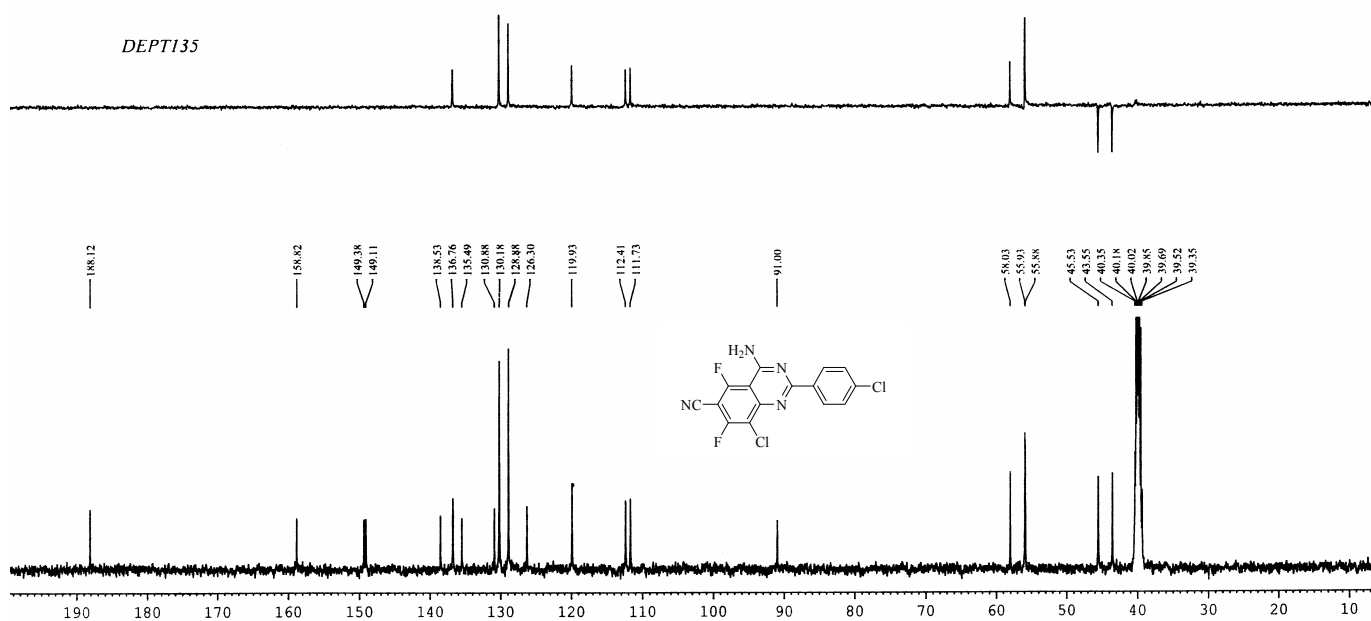

Figure 11.  $^{13}\text{C}$  NMR (125 MHz,  $\text{DMSO-}d_6$ ) spectra of compound 3e

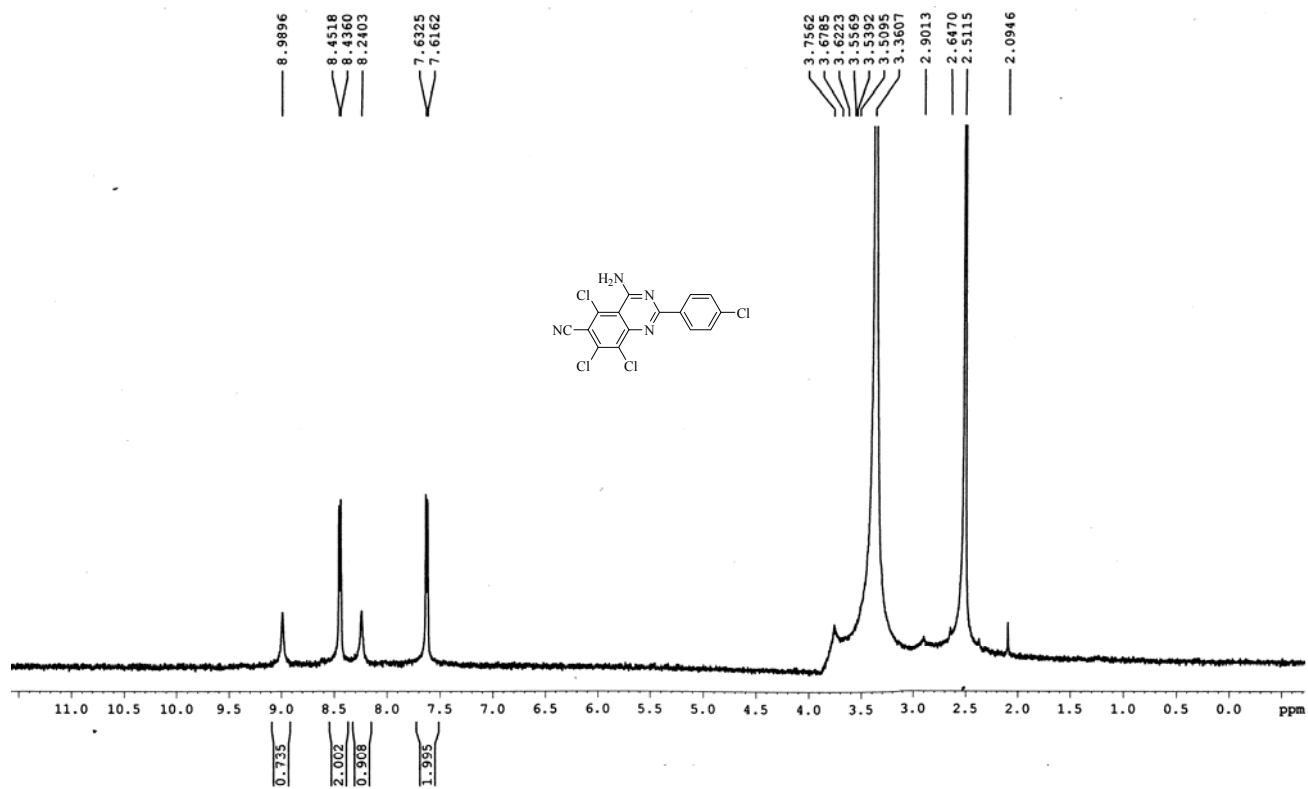

Figure 12.  $^1\text{H}$  NMR (500 MHz,  $\text{DMSO-}d_6$ ) spectra of compound 3f

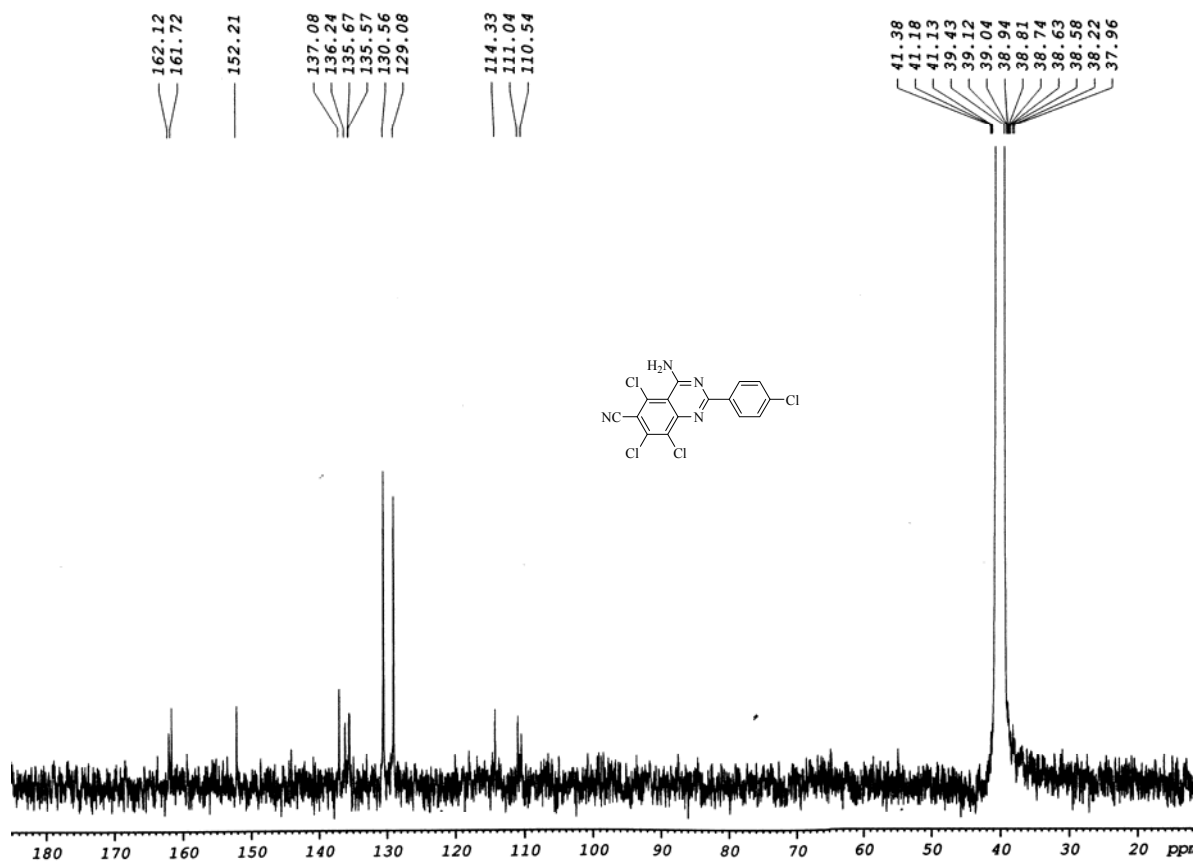

Figure 13. <sup>13</sup>C NMR (125 MHz, DMSO-*d*<sub>6</sub>) spectra of compound **3f**

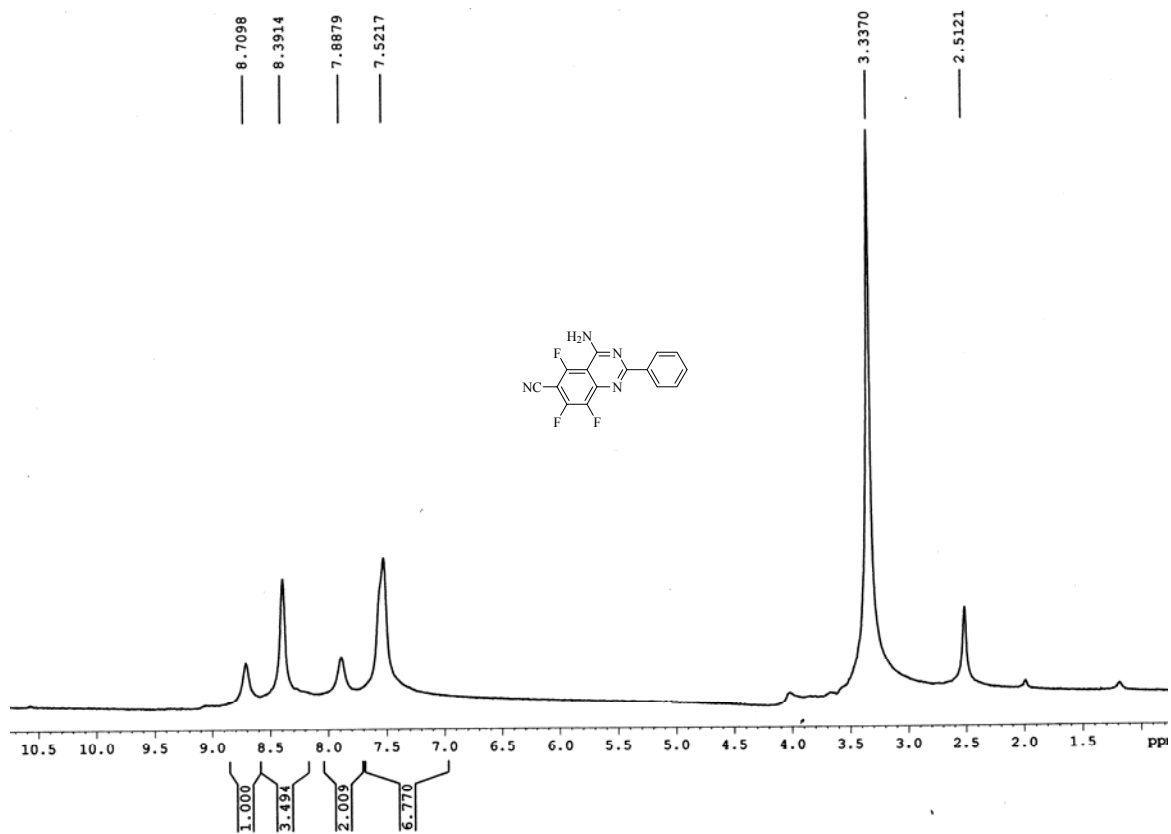

Figure 14. <sup>1</sup>H NMR (500 MHz, DMSO-*d*<sub>6</sub>) spectra of compound **3g**

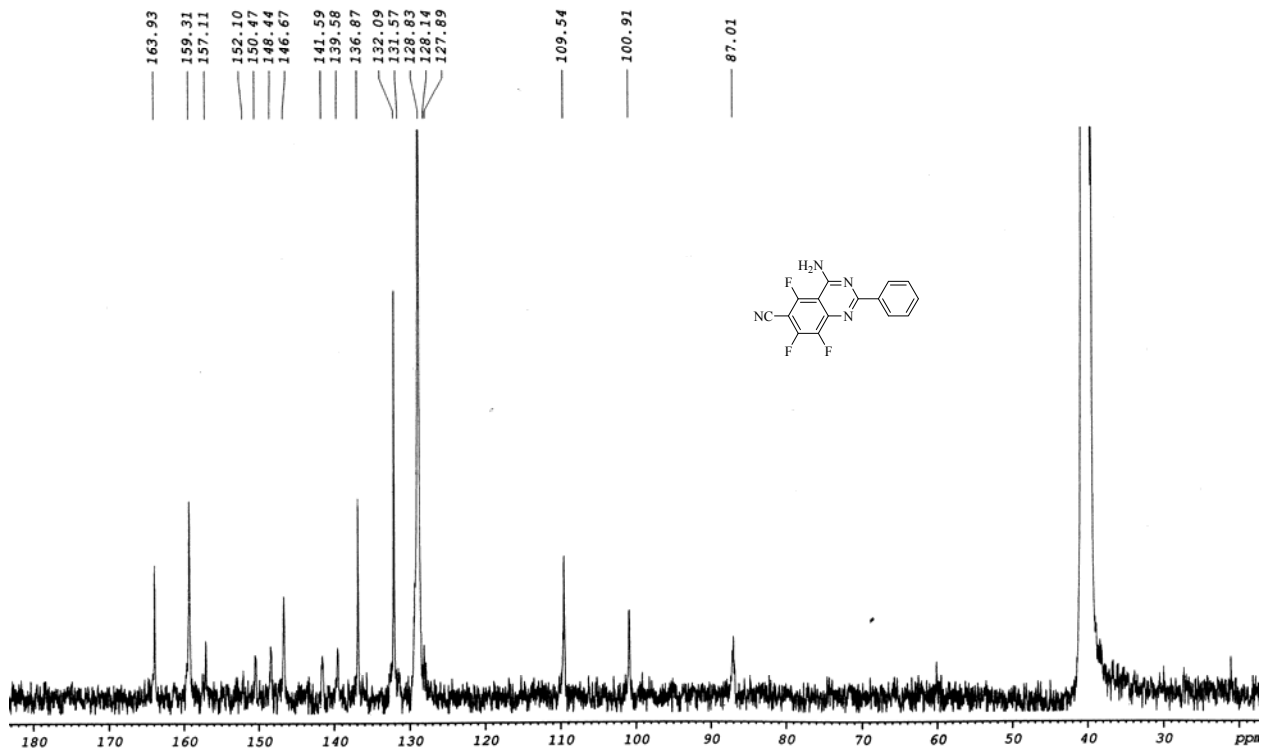

**Figure 15.** <sup>13</sup>C NMR (125 MHz, DMSO-*d*<sub>6</sub>) spectra of compound **3g**

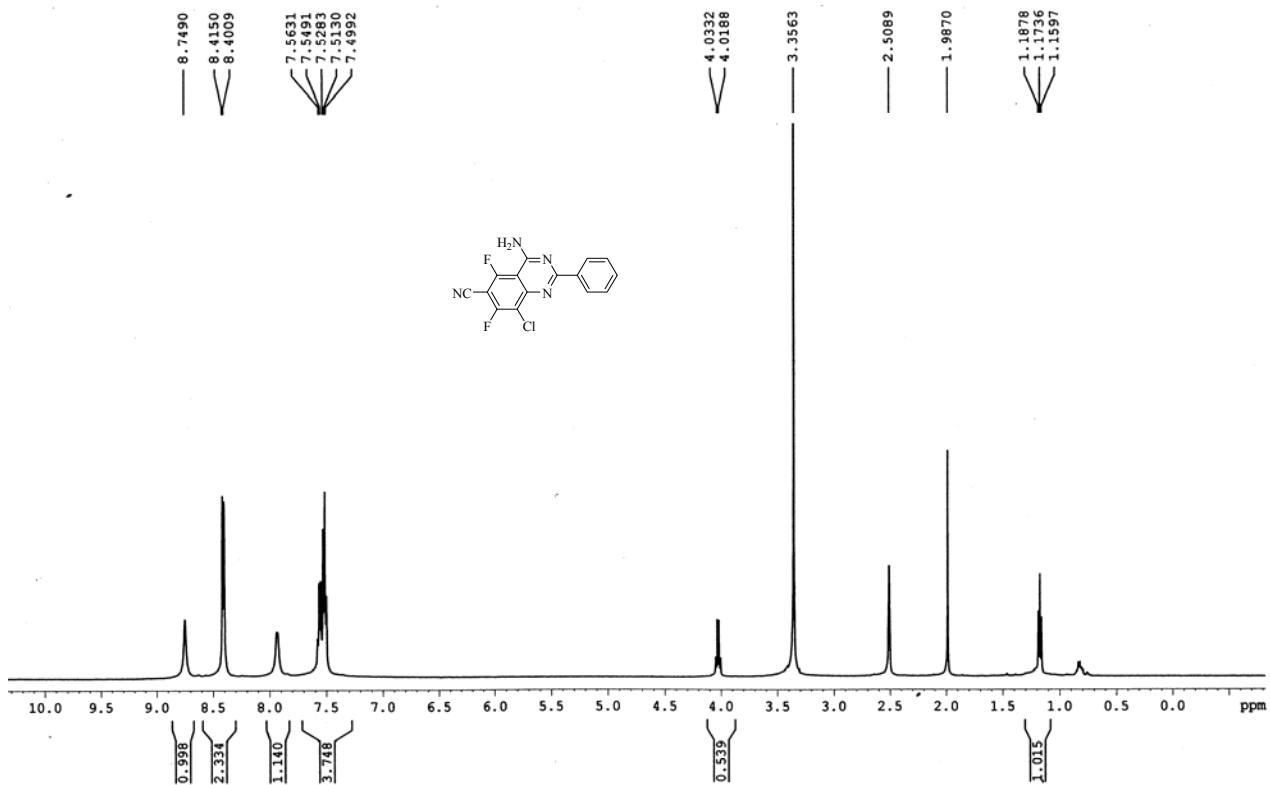

**Figure 16.** <sup>1</sup>H NMR (500 MHz, DMSO-*d*<sub>6</sub>) spectra of compound **3h**

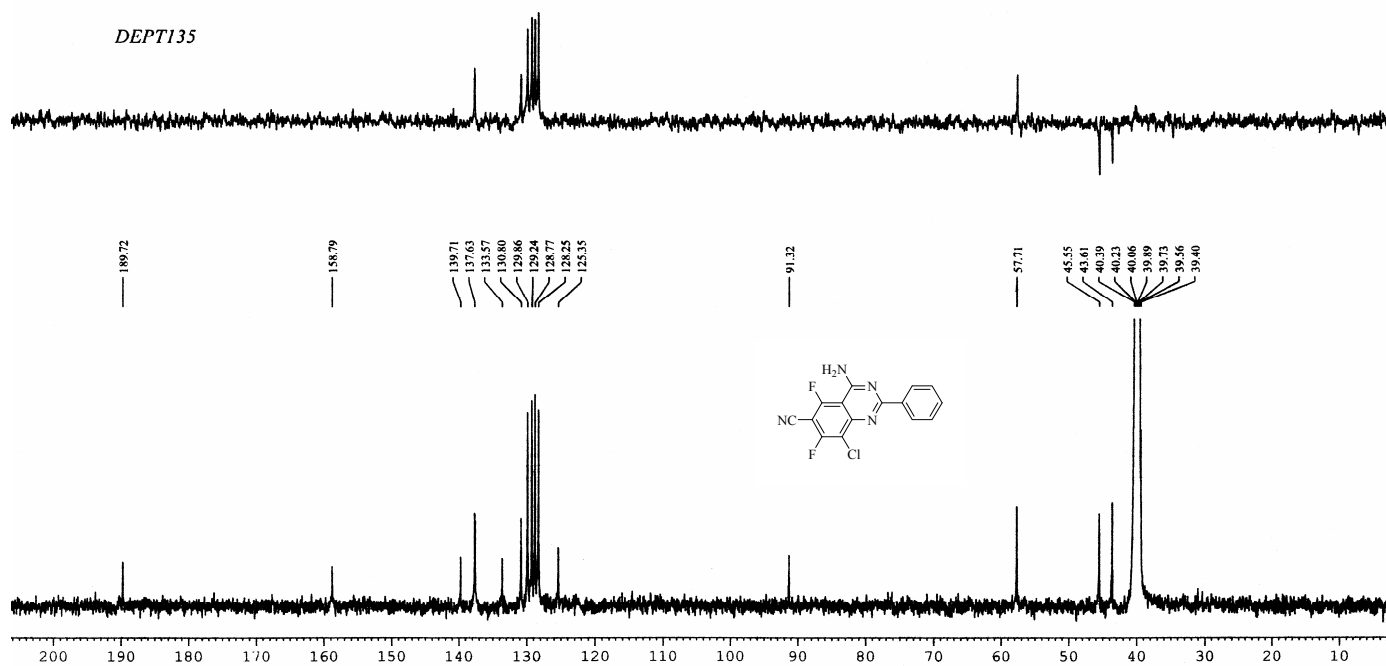

Figure 17.  $^{13}\text{C}$  NMR (125 MHz,  $\text{DMSO-}d_6$ ) spectra of compound 3h

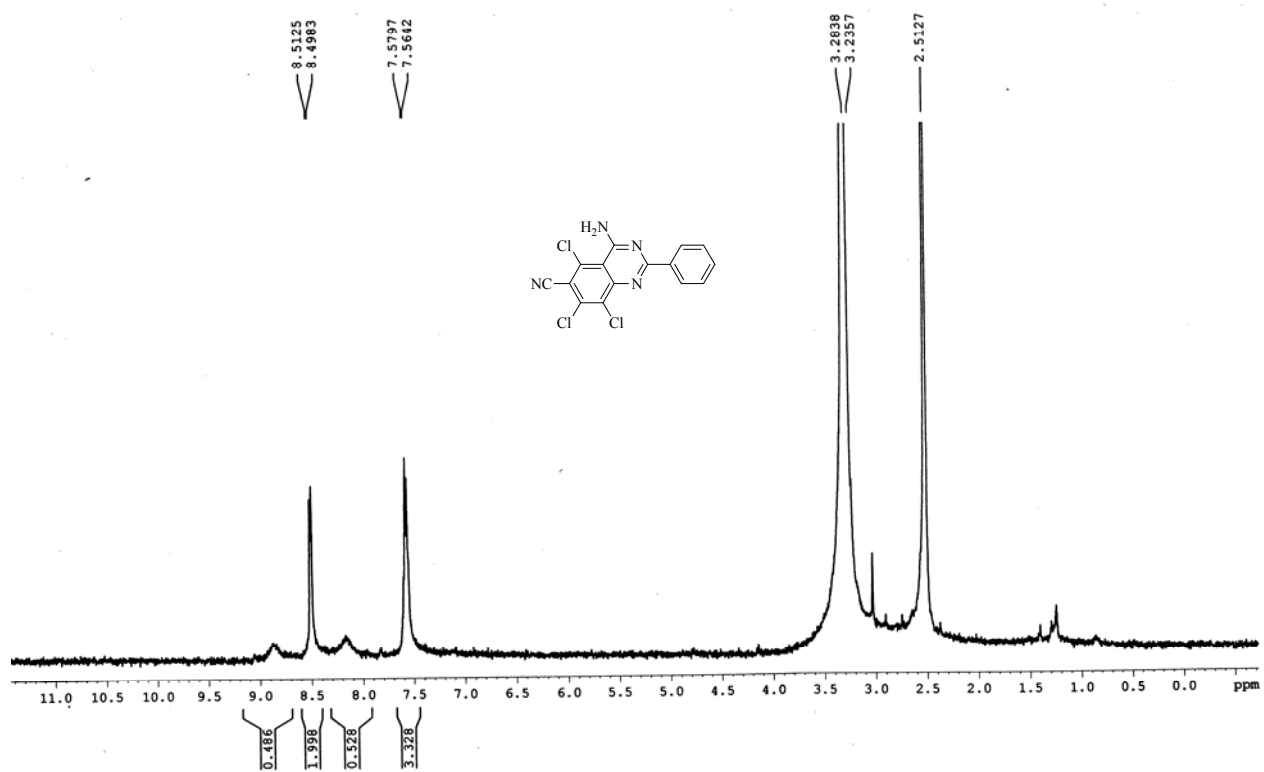

Figure 18.  $^1\text{H}$  NMR (500 MHz,  $\text{DMSO-}d_6$ ) spectra of compound 3i

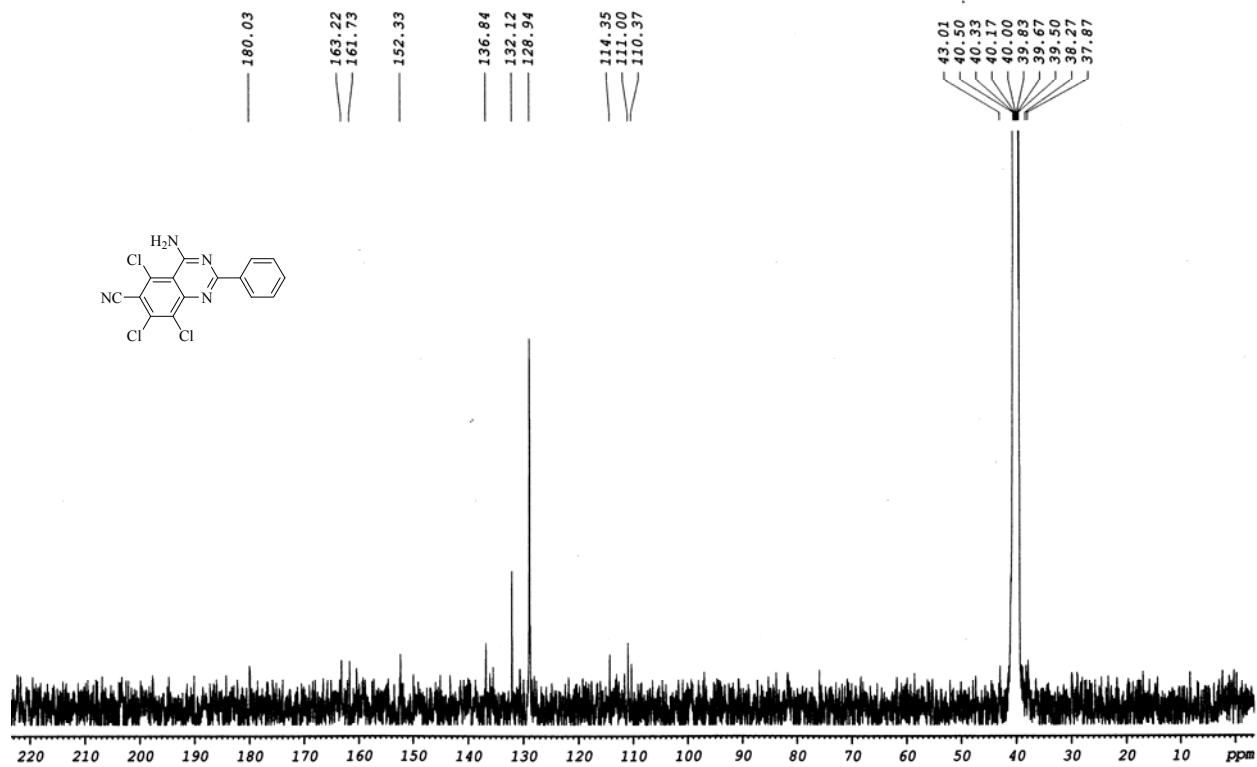

Figure 19.  $^{13}\text{C}$  NMR (125 MHz,  $\text{DMSO-}d_6$ ) spectra of compound **3i**

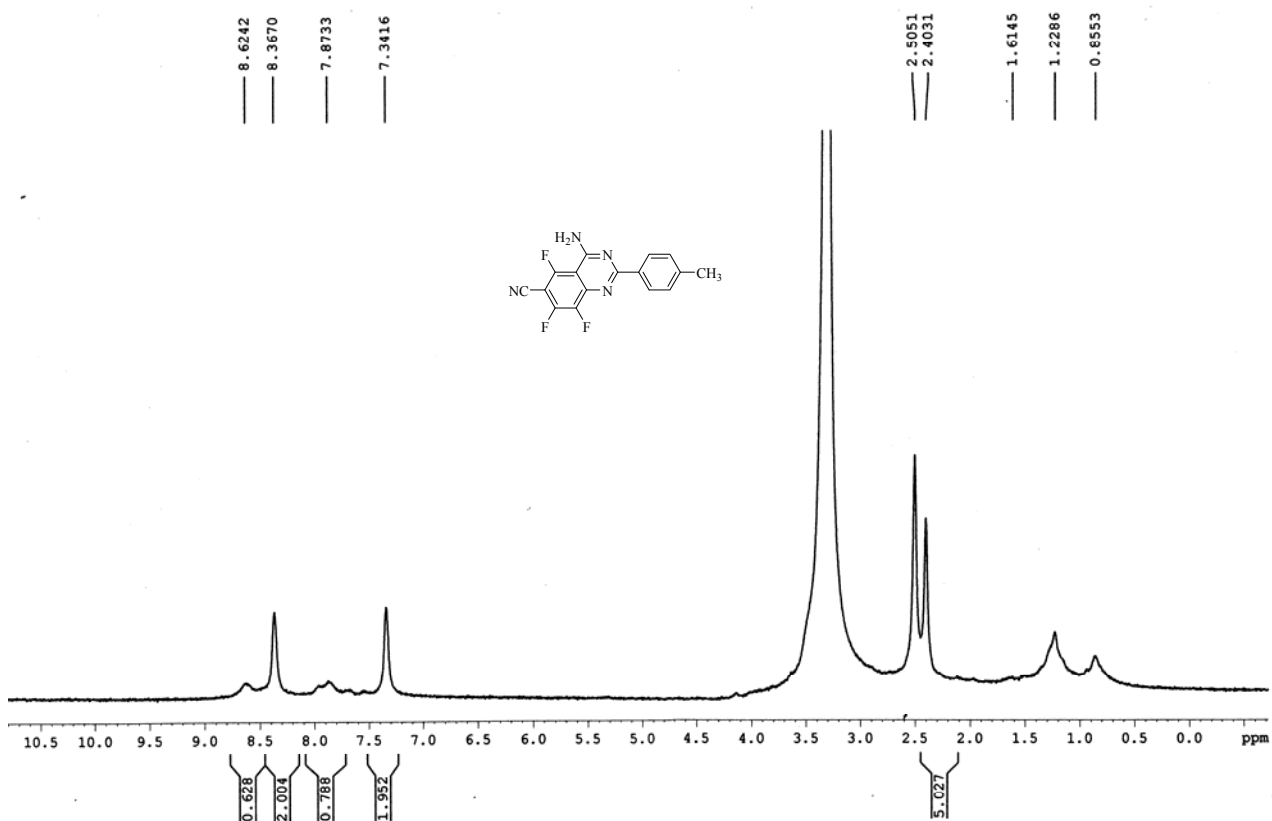

Figure 20.  $^1\text{H}$  NMR (500 MHz,  $\text{CDCl}_3$ ) spectra of compound **3j**

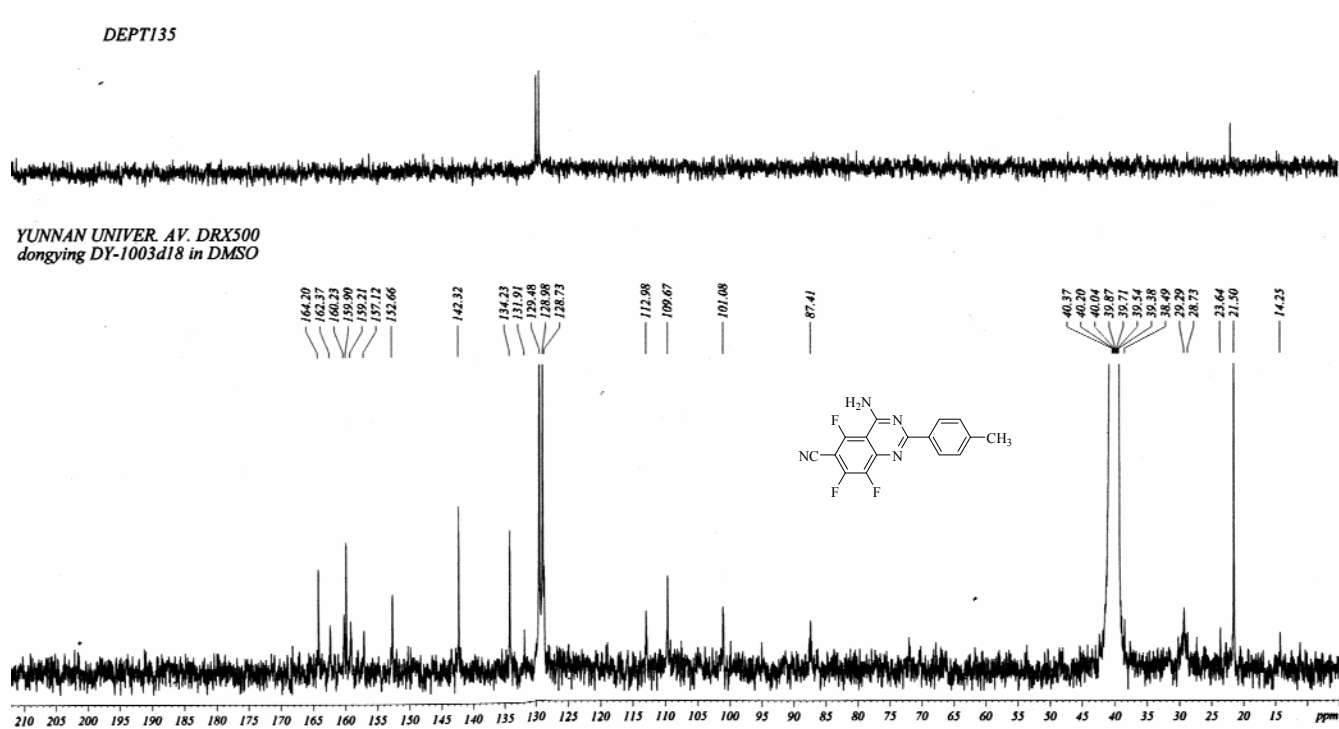

Figure 21.  $^{13}\text{C}$  NMR (125 MHz,  $\text{CDCl}_3$ ) spectra of compound 3j

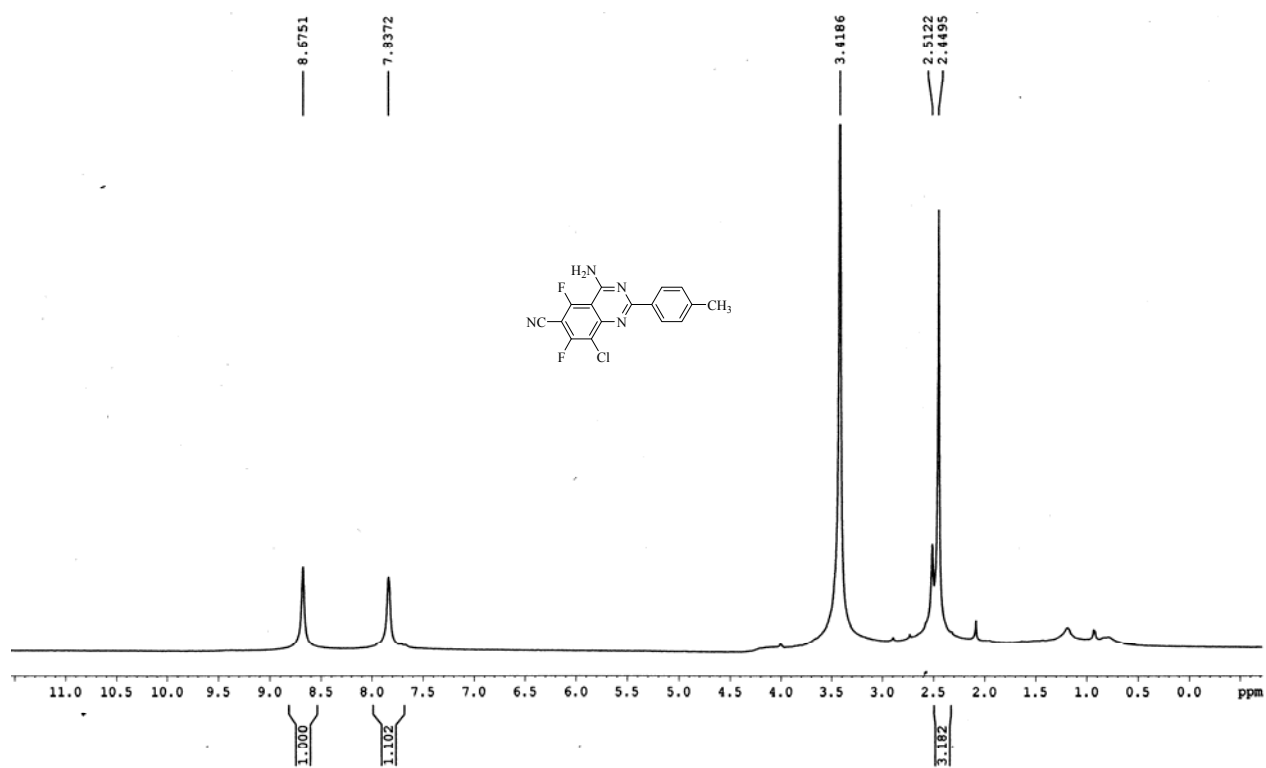

Figure 22.  $^1\text{H}$  NMR (500 MHz,  $\text{DMSO}-d_6$ ) spectra of compound 3k

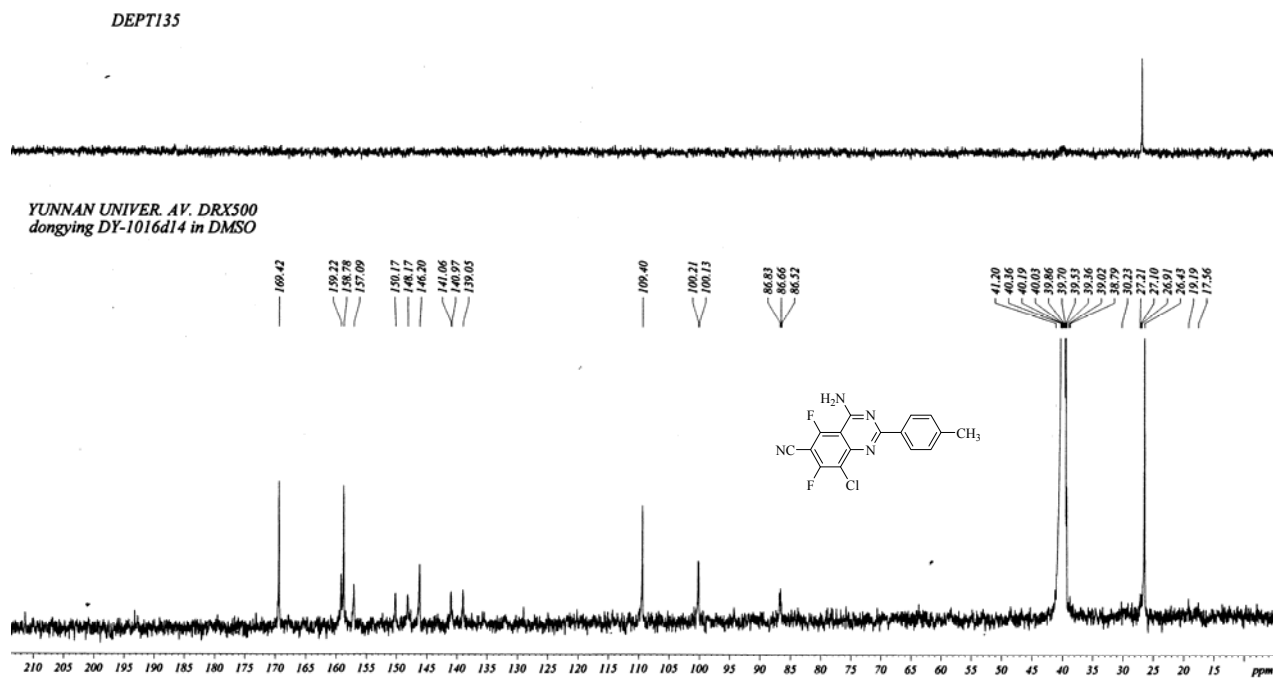

Figure 23.  $^{13}\text{C}$  NMR (125 MHz,  $\text{DMSO-}d_6$ ) spectra of compound **3k**

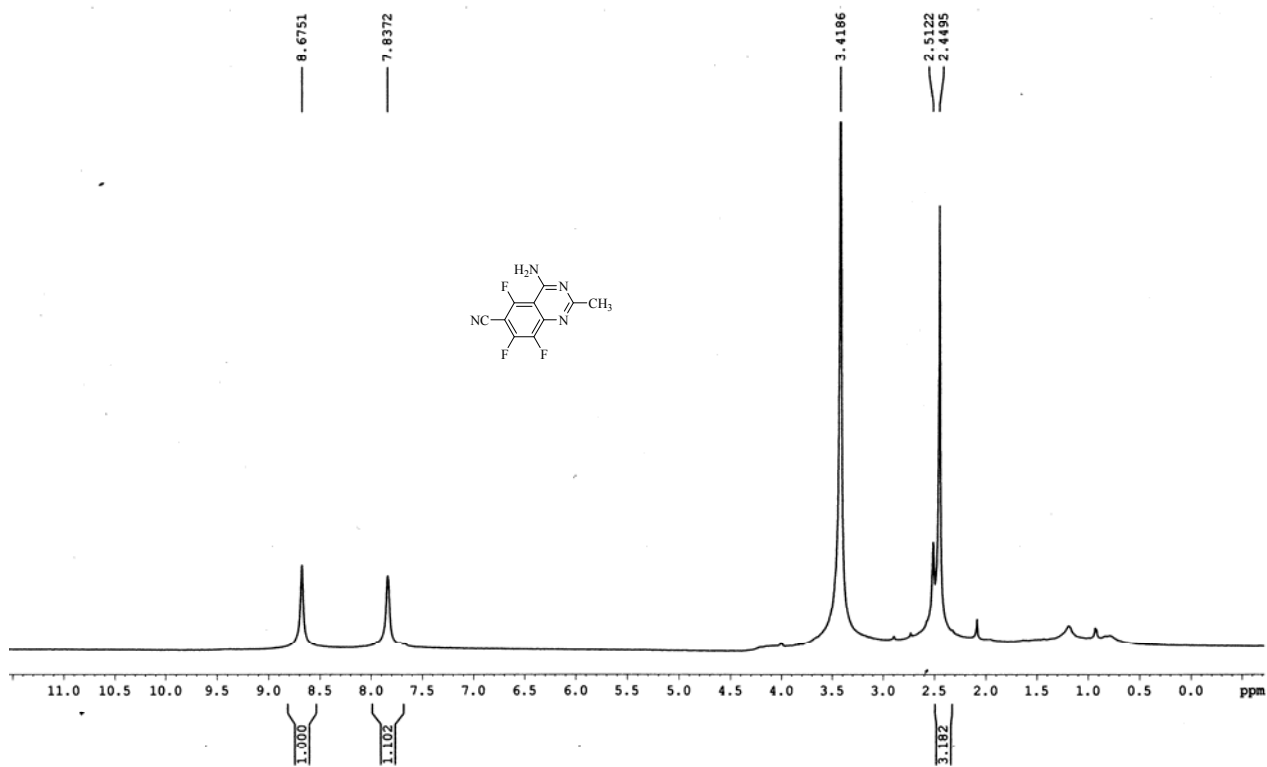

Figure 24.  $^1\text{H}$  NMR (500 MHz,  $\text{DMSO-}d_6$ ) spectra of compound **3l**



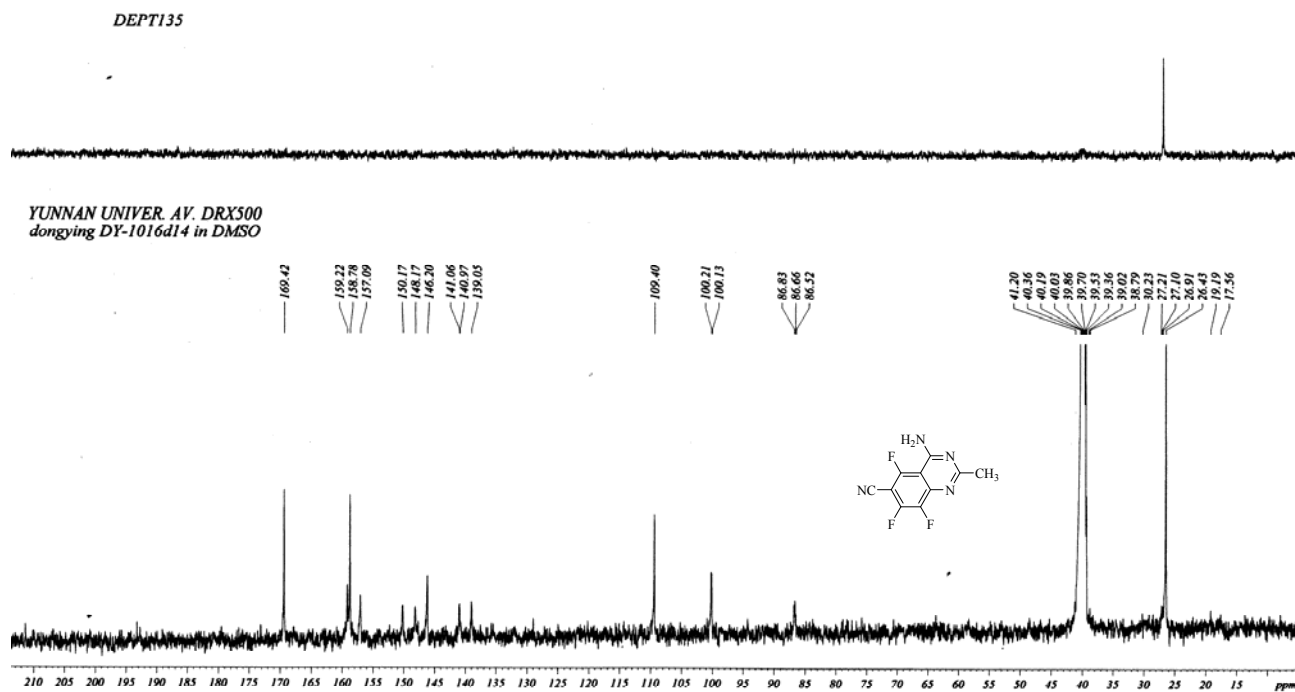

Figure 25.  $^{13}\text{C}$  NMR (125 MHz,  $\text{DMSO-}d_6$ ) spectra of compound 3l

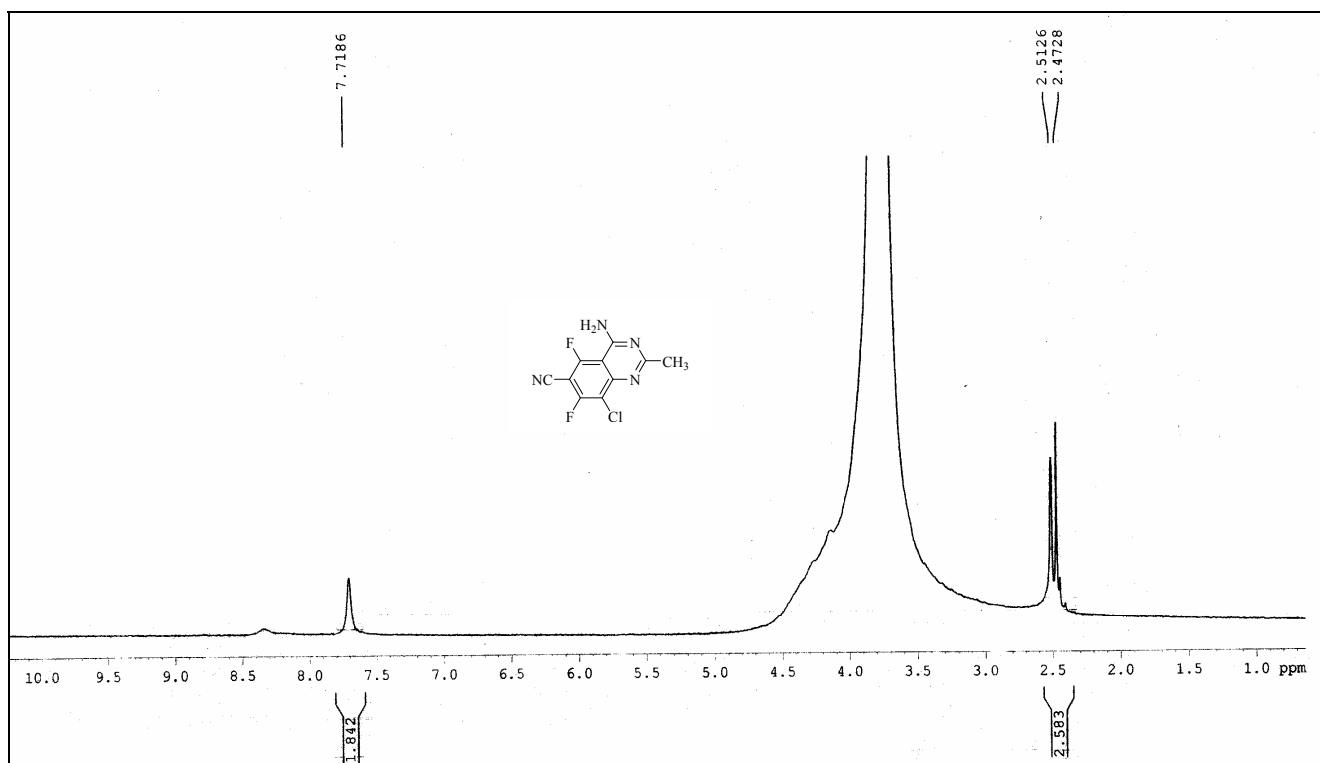

Figure 26.  $^1\text{H}$  NMR (500 MHz,  $\text{DMSO-}d_6$ ) spectra of compound 3m

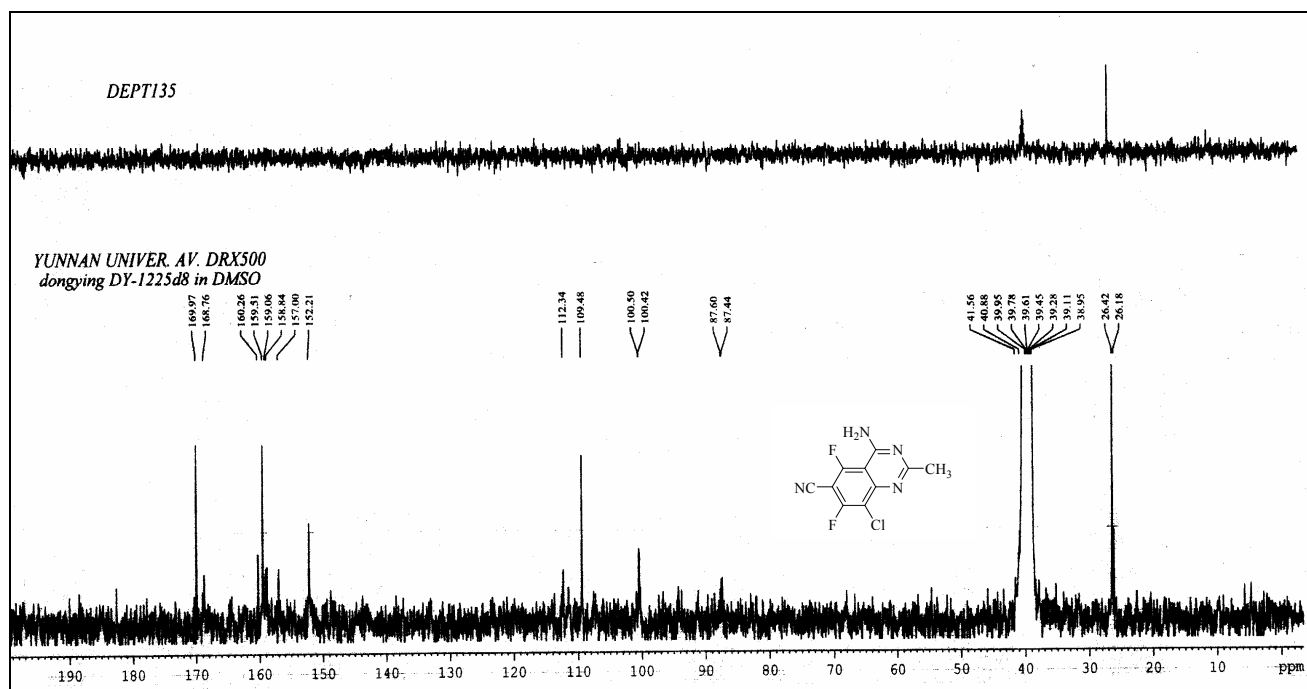

Figure 27.  $^{13}\text{C}$  NMR (125 MHz,  $\text{DMSO-}d_6$ ) spectra of compound 3m

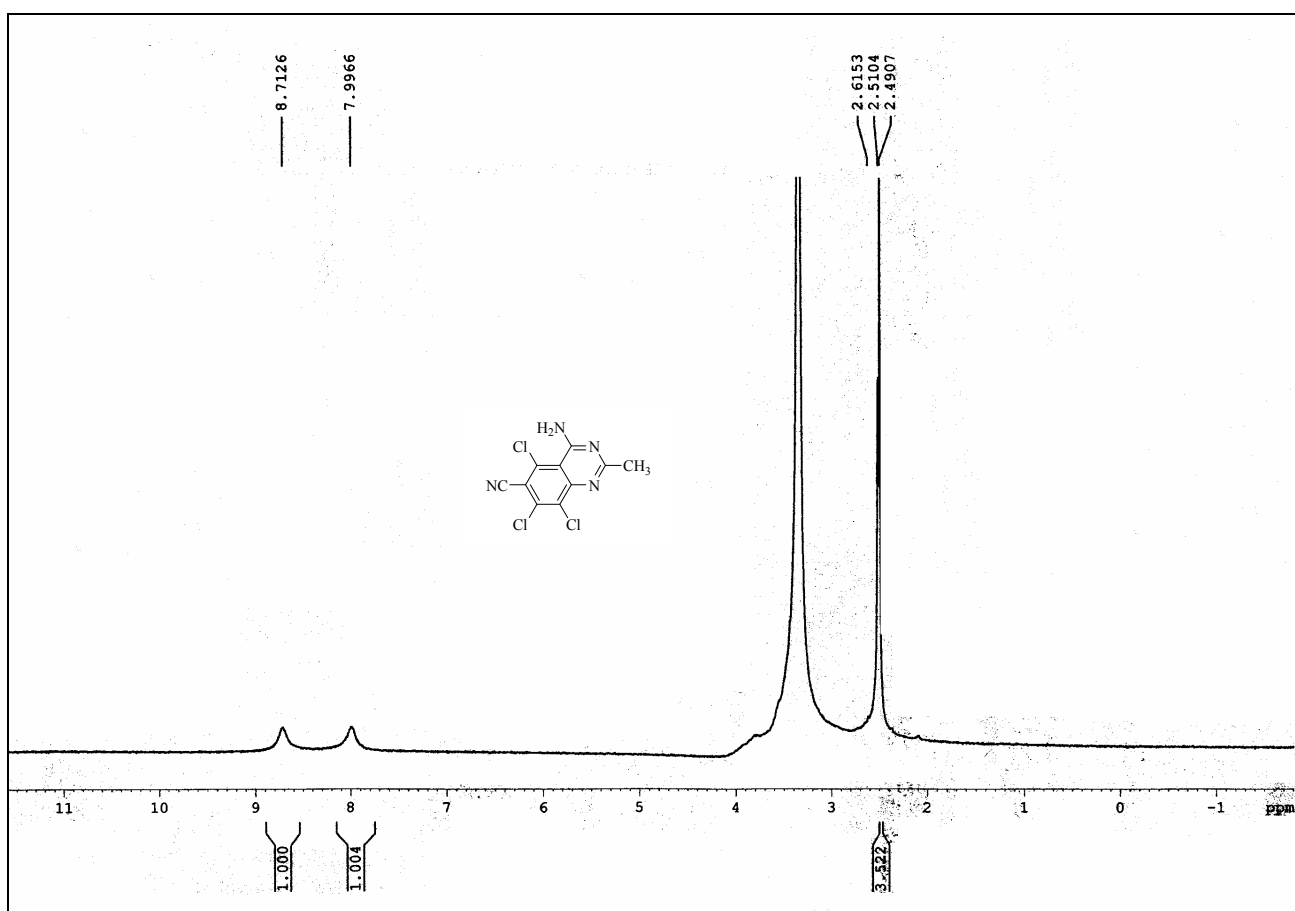

Figure 28.  $^1\text{H}$  NMR (500 MHz,  $\text{DMSO-}d_6$ ) spectra of compound 3n

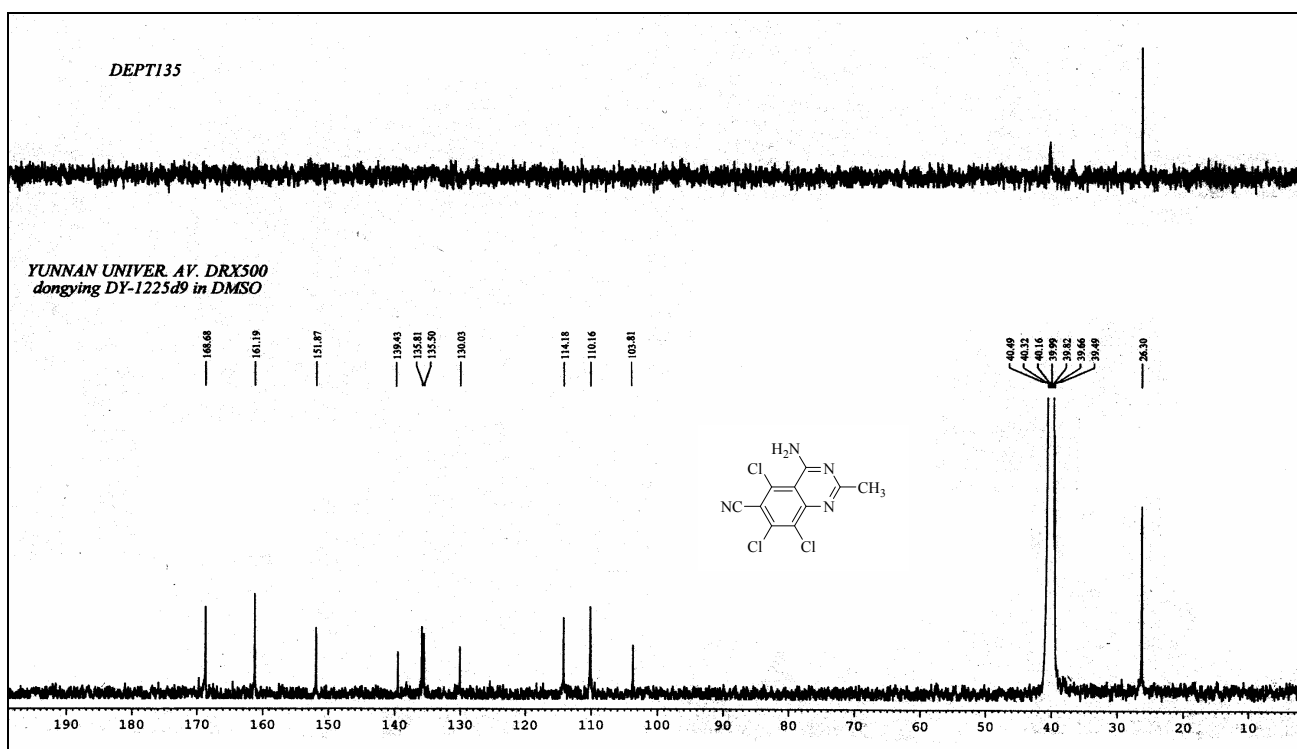

Figure 29.  $^{13}\text{C}$  NMR (125 MHz,  $\text{DMSO-}d_6$ ) spectra of compound **3n**

**$^1\text{H}$  NMR and  $^{13}\text{C}$  NMR Spectra for Polyhalo 3-Aminoindazoles 5 and 7**

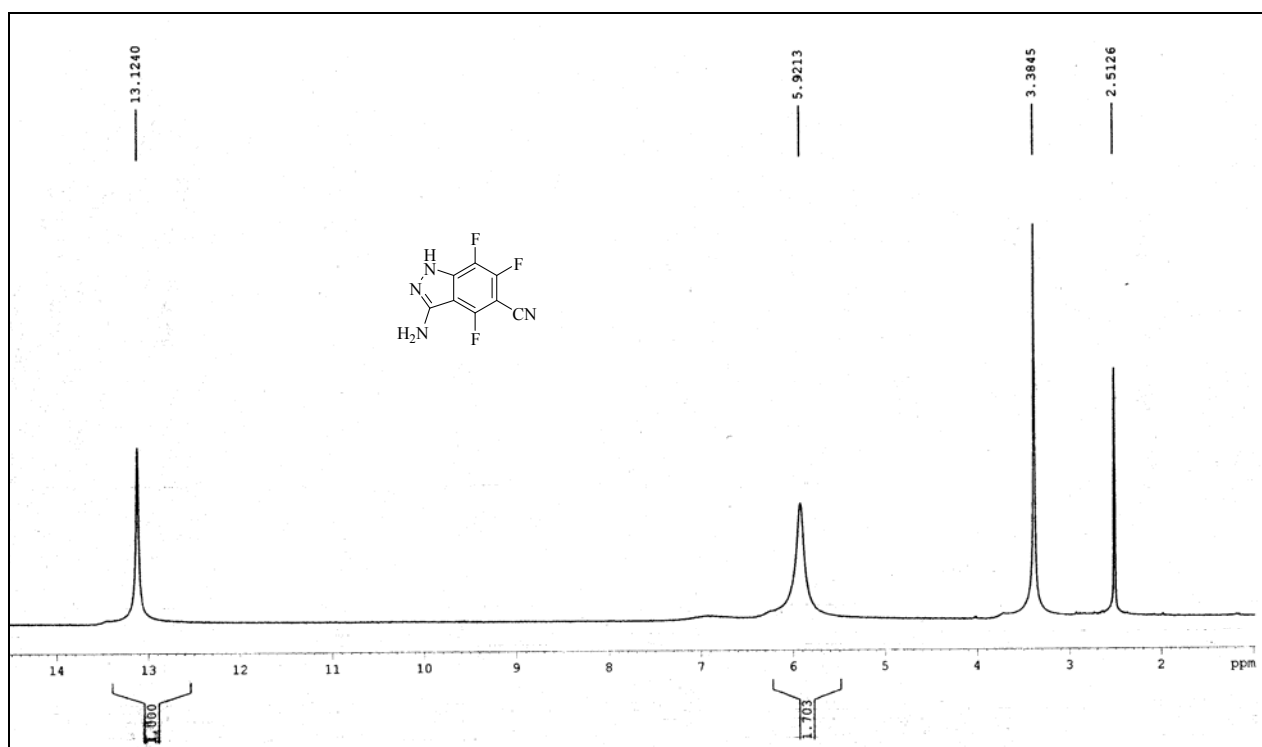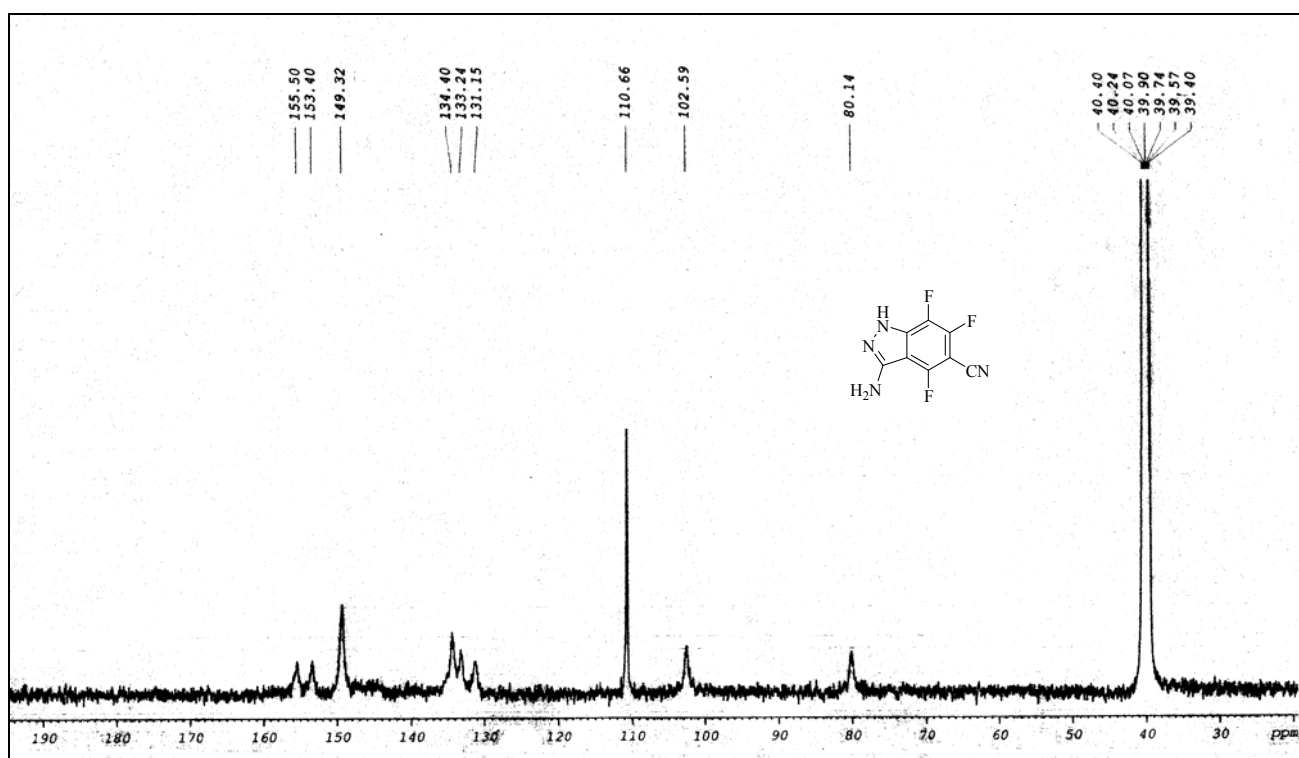

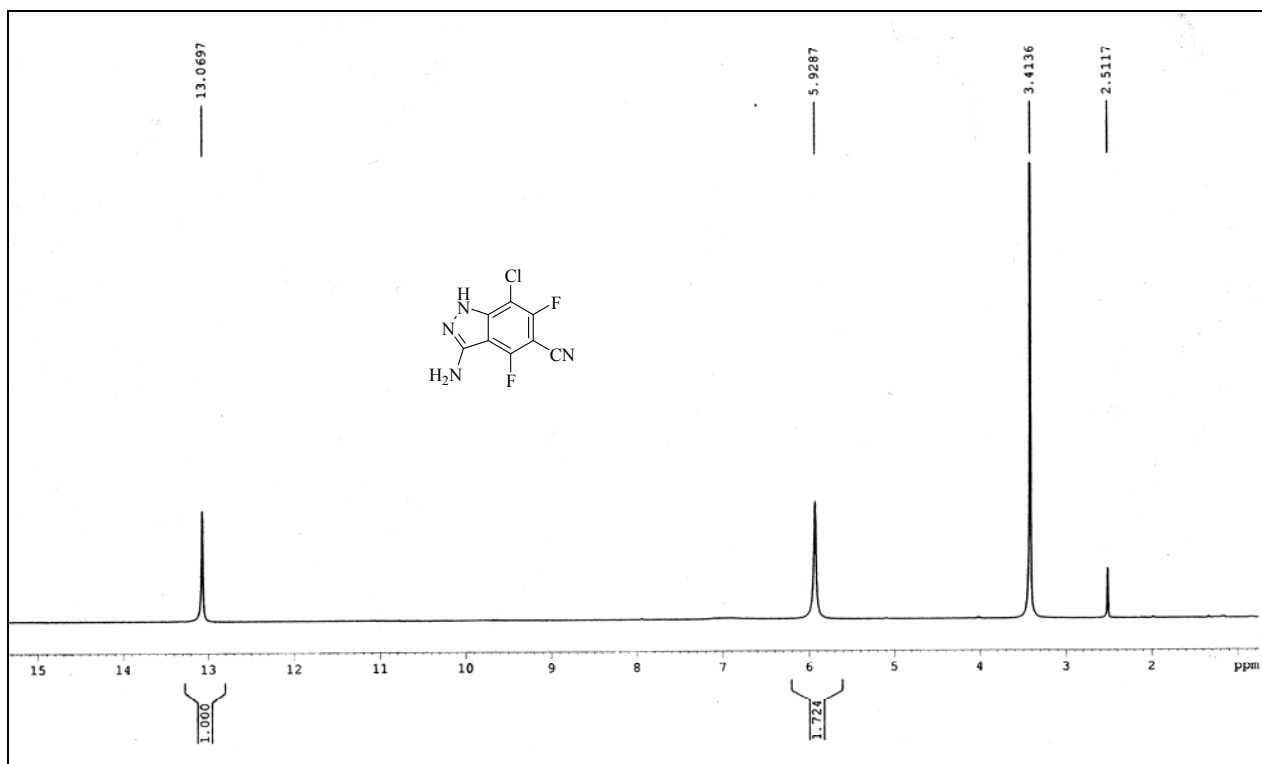

**Figure 32.**  $^1\text{H}$  NMR (500 MHz,  $\text{DMSO-}d_6$ ) spectra of compound **5b**

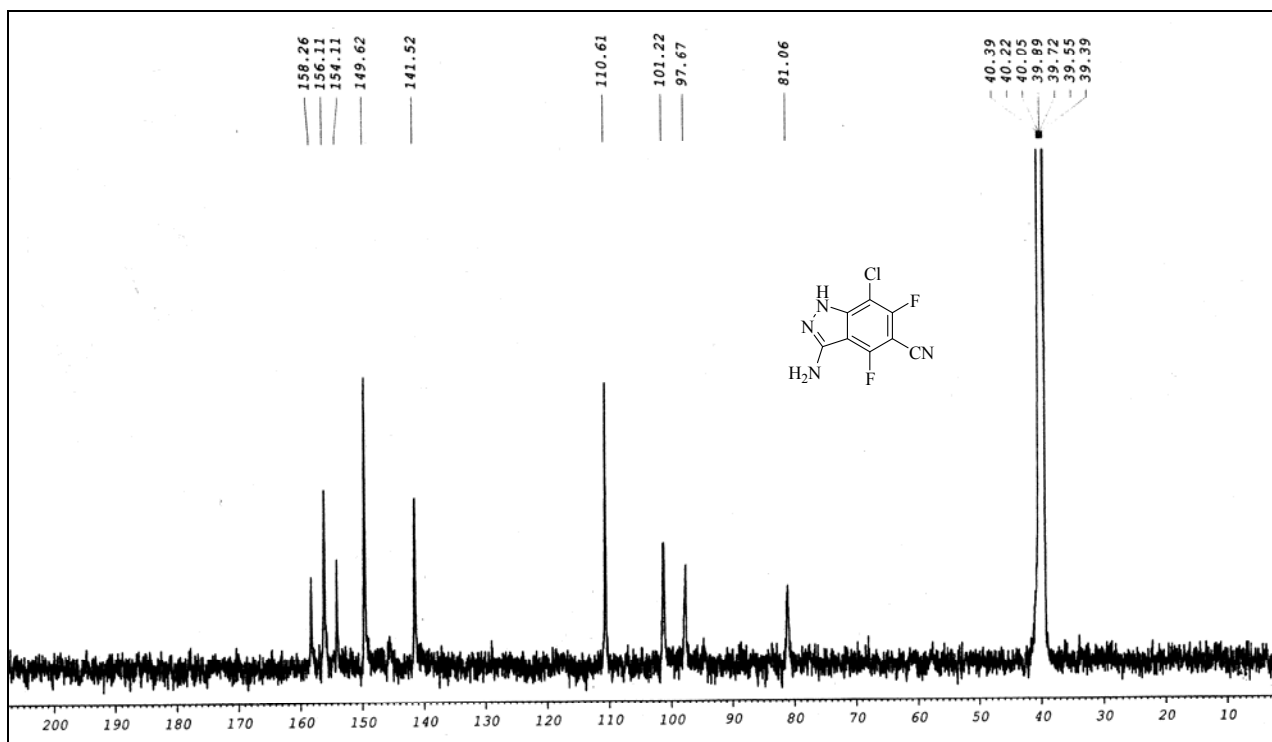

**Figure 33.**  $^{13}\text{C}$  NMR (125 MHz,  $\text{DMSO-}d_6$ ) spectra of compound **5b**

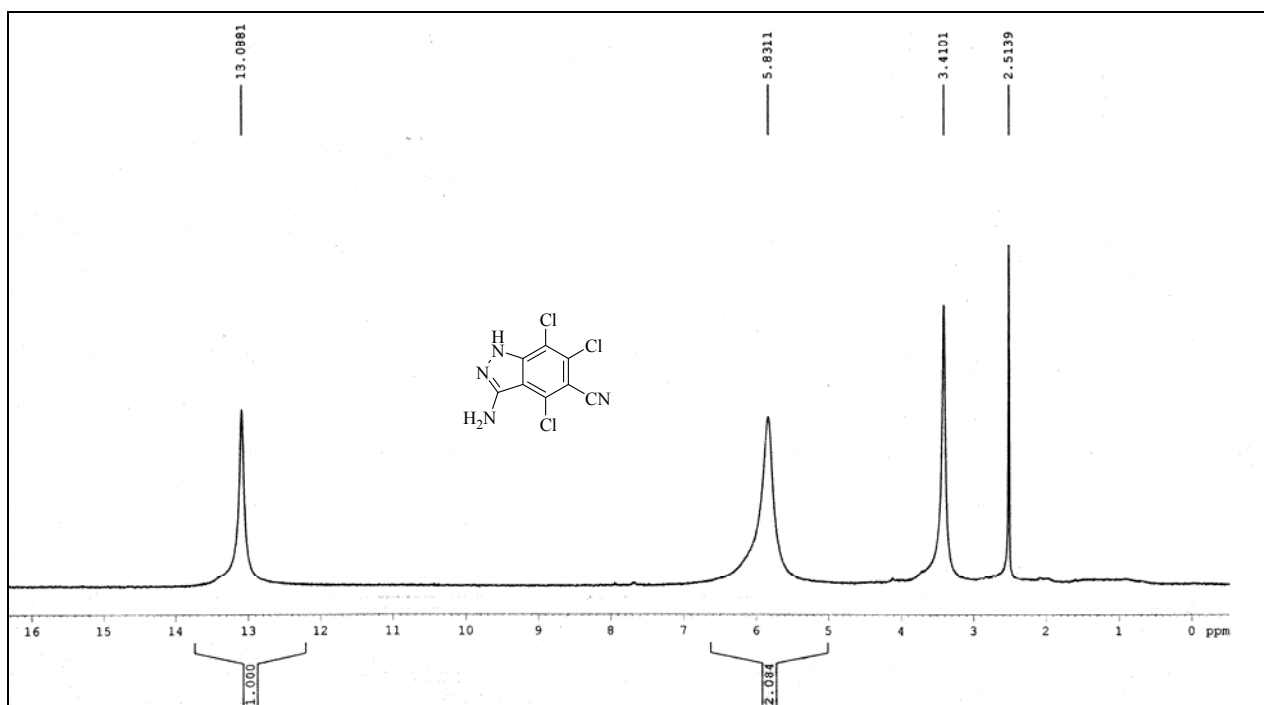

**Figure 34.**  $^1\text{H}$  NMR (500 MHz,  $\text{DMSO-}d_6$ ) spectra of compound **5c**

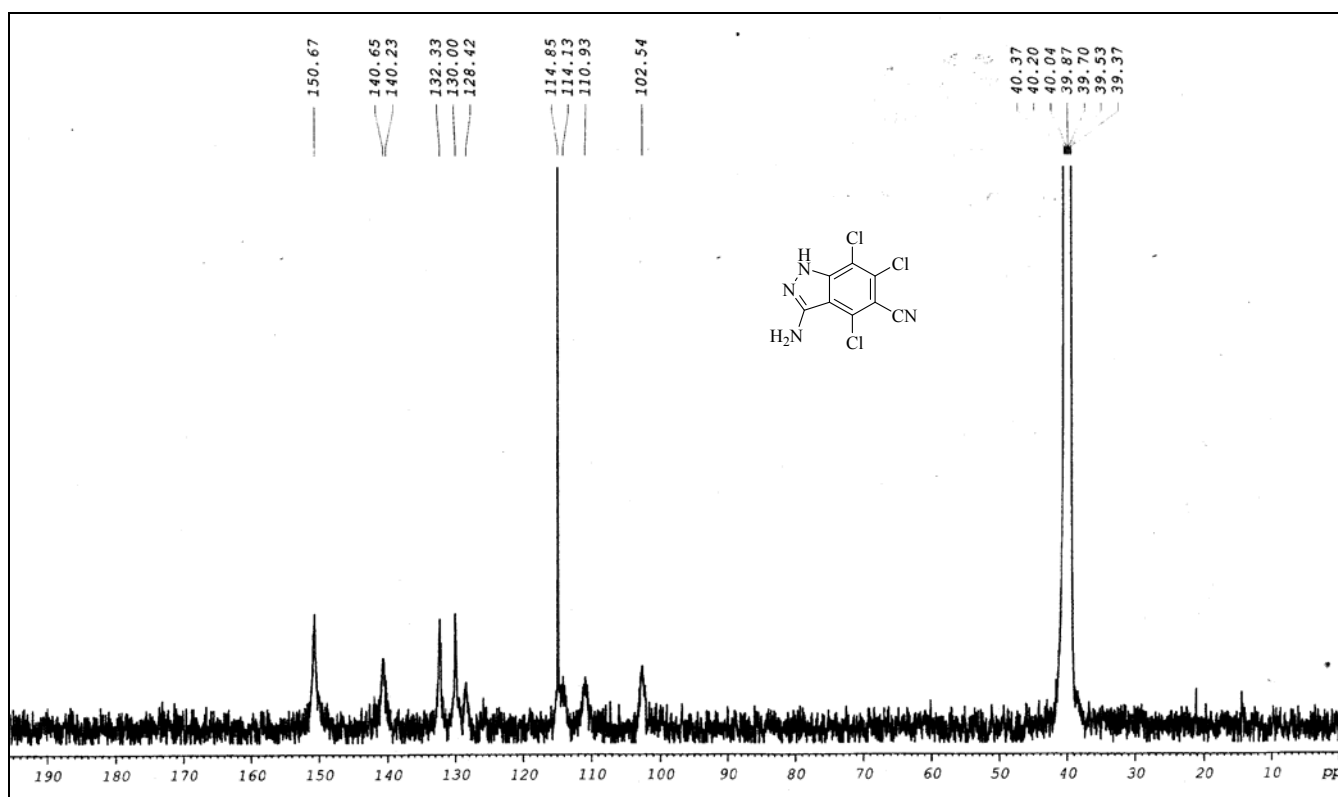

**Figure 35.**  $^{13}\text{C}$  NMR (125 MHz,  $\text{DMSO-}d_6$ ) spectra of compound **5c**

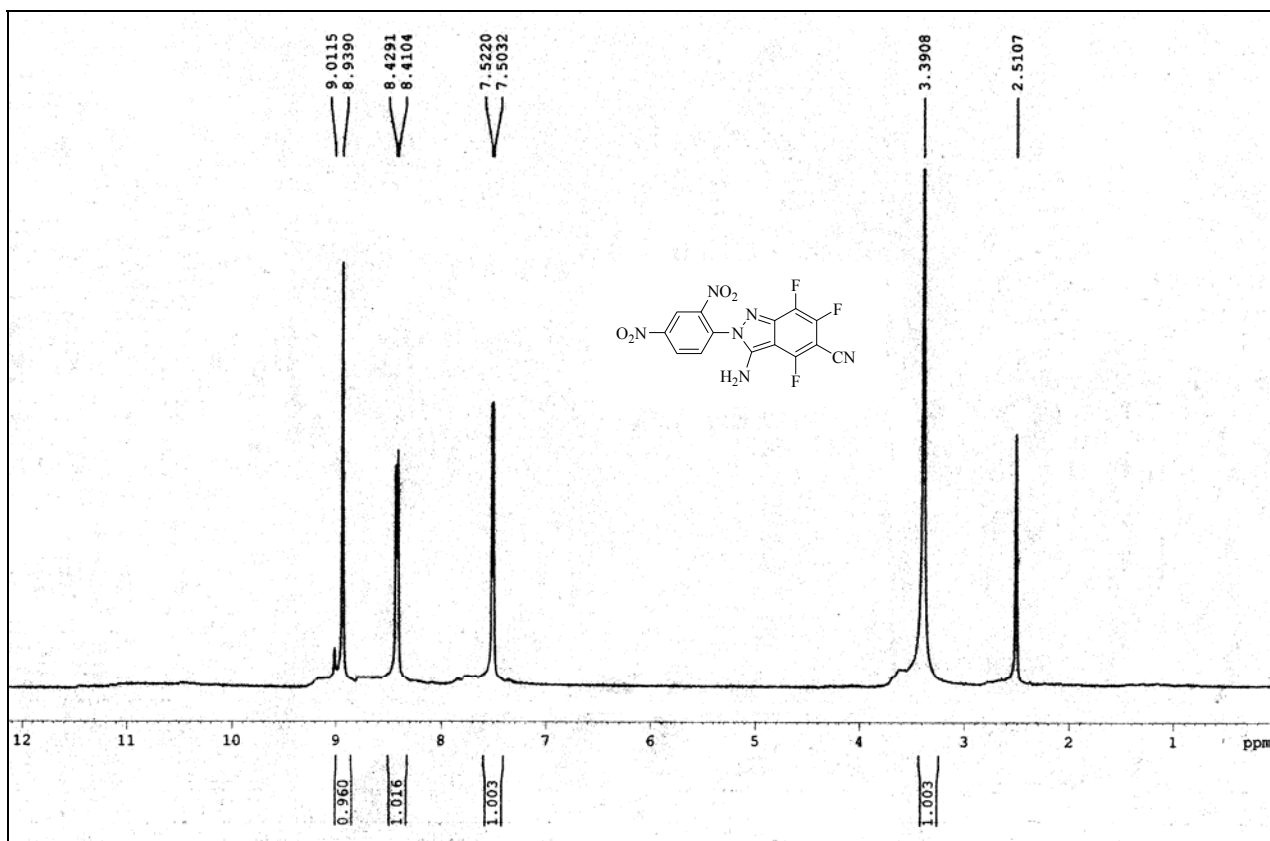

Figure 36.  $^1\text{H}$  NMR (500 MHz,  $\text{DMSO-}d_6$ ) spectra of compound 7a

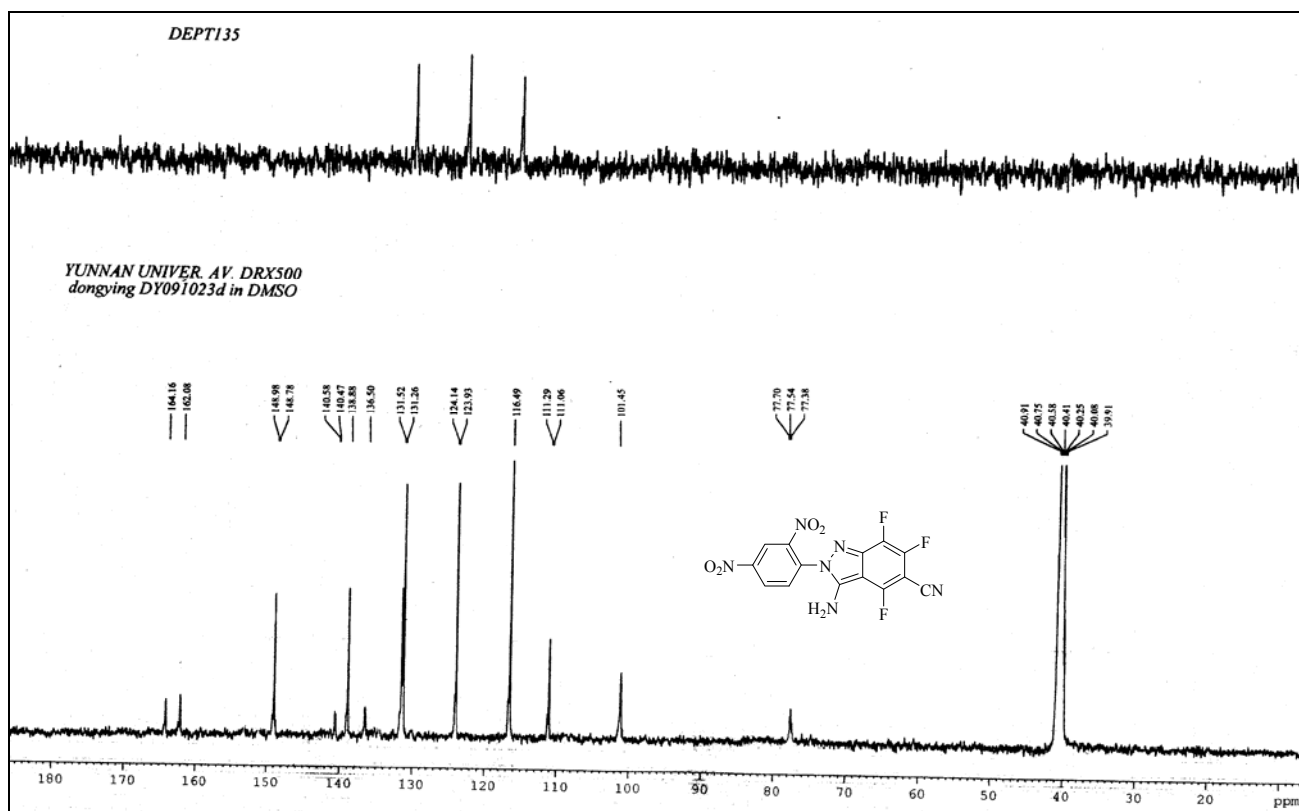

Figure 37.  $^{13}\text{C}$  NMR (125 MHz,  $\text{DMSO-}d_6$ ) spectra of compound 7a

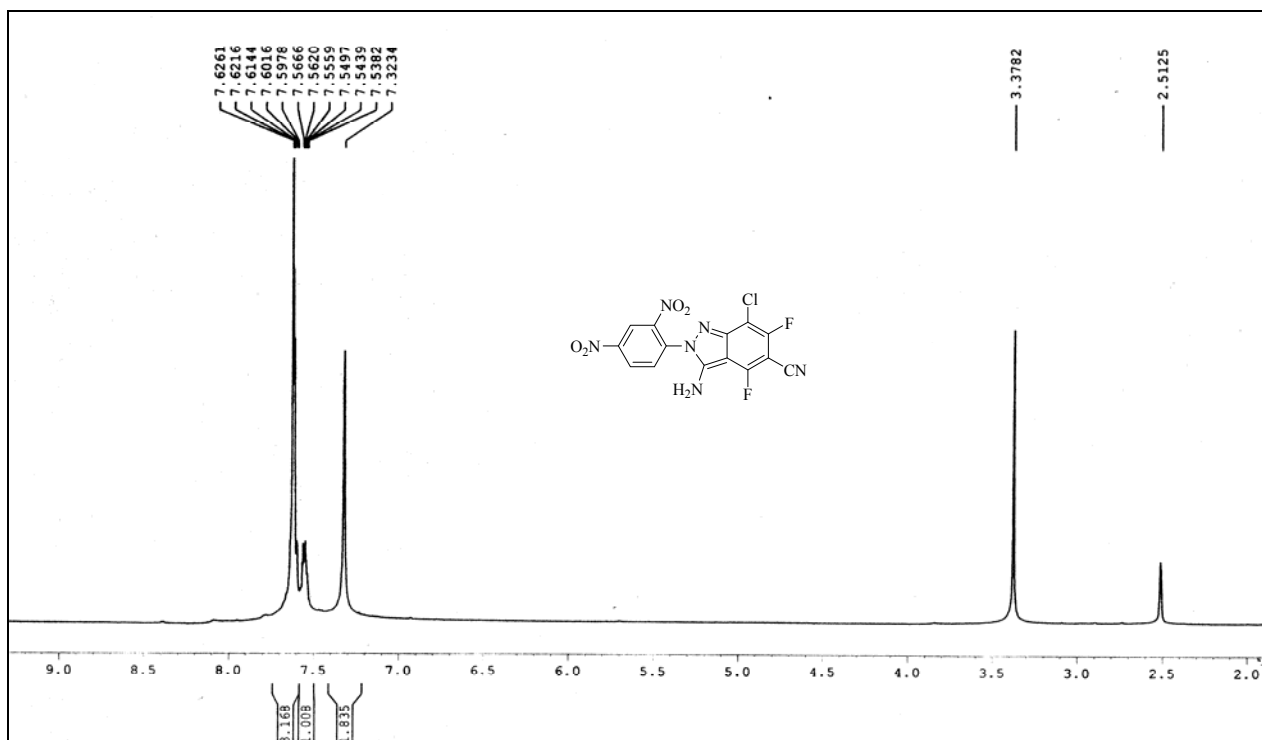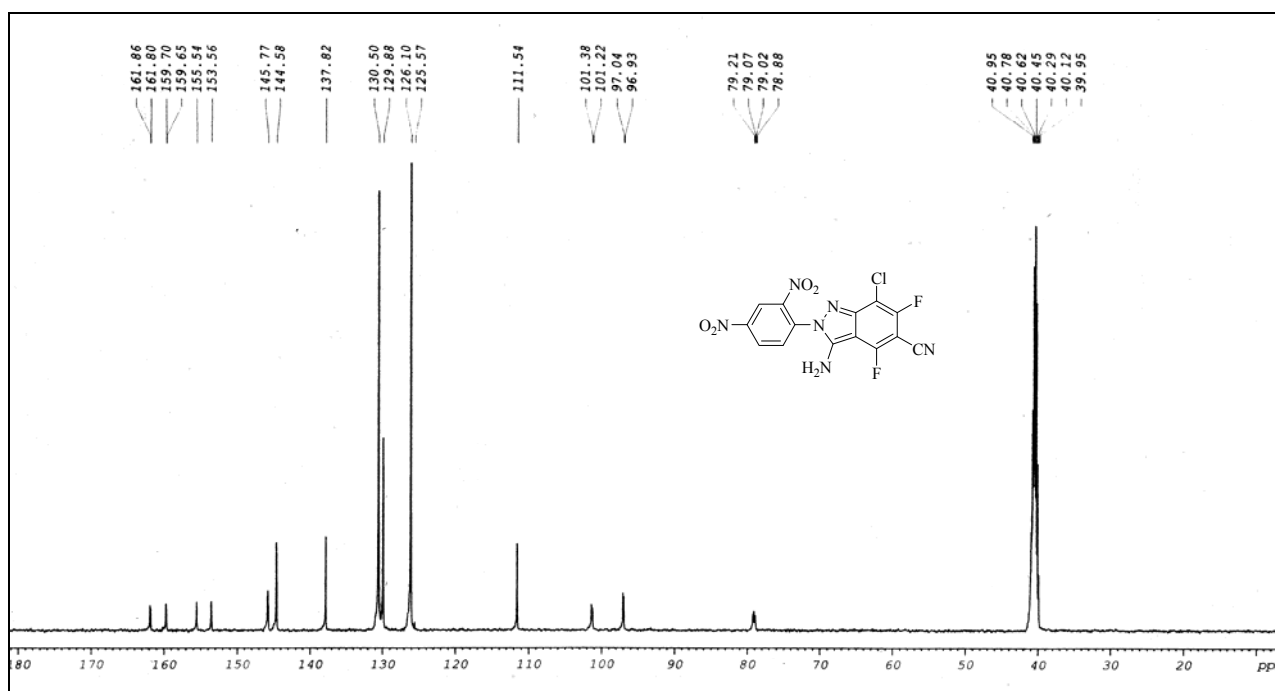



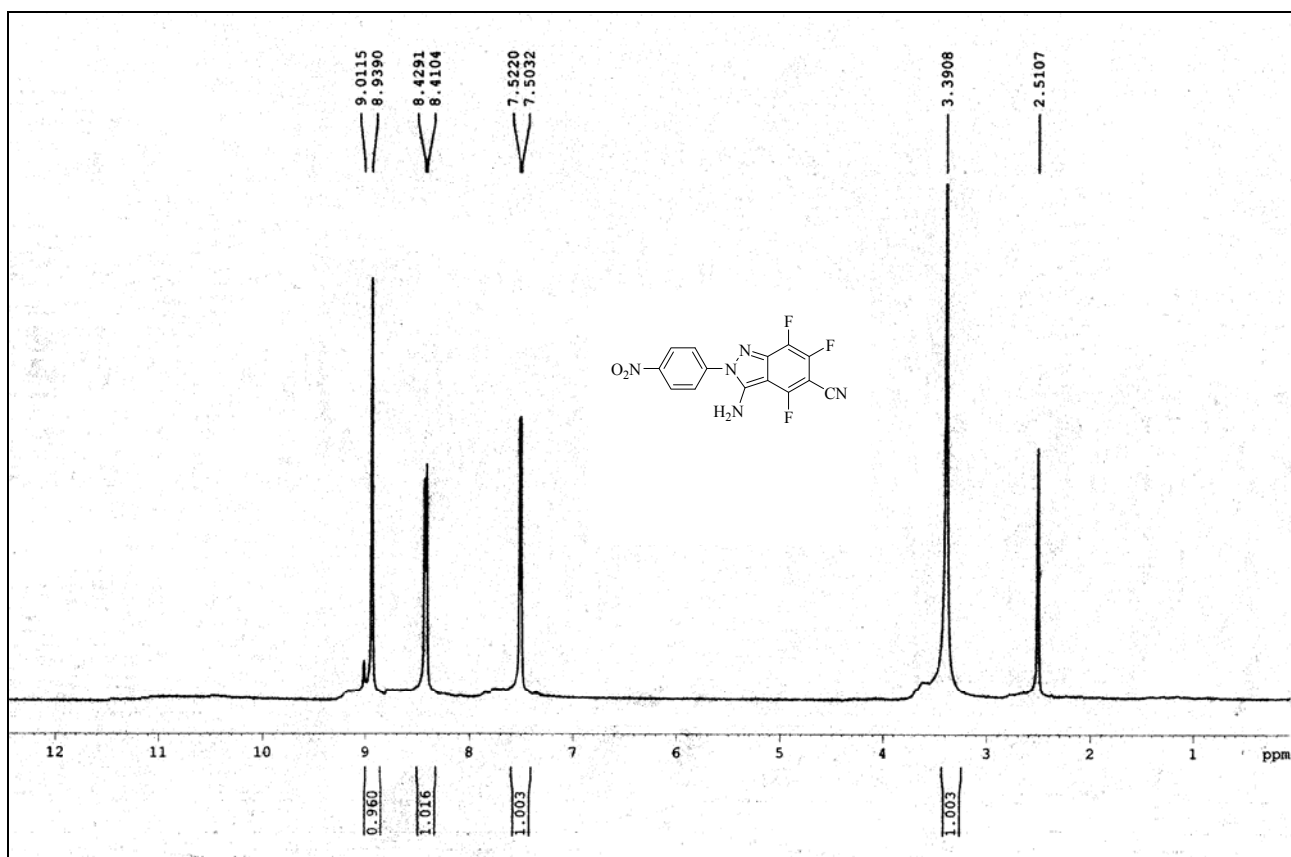

Figure 40.  $^1\text{H}$  NMR (500 MHz,  $\text{DMSO-}d_6$ ) spectra of compound 7c

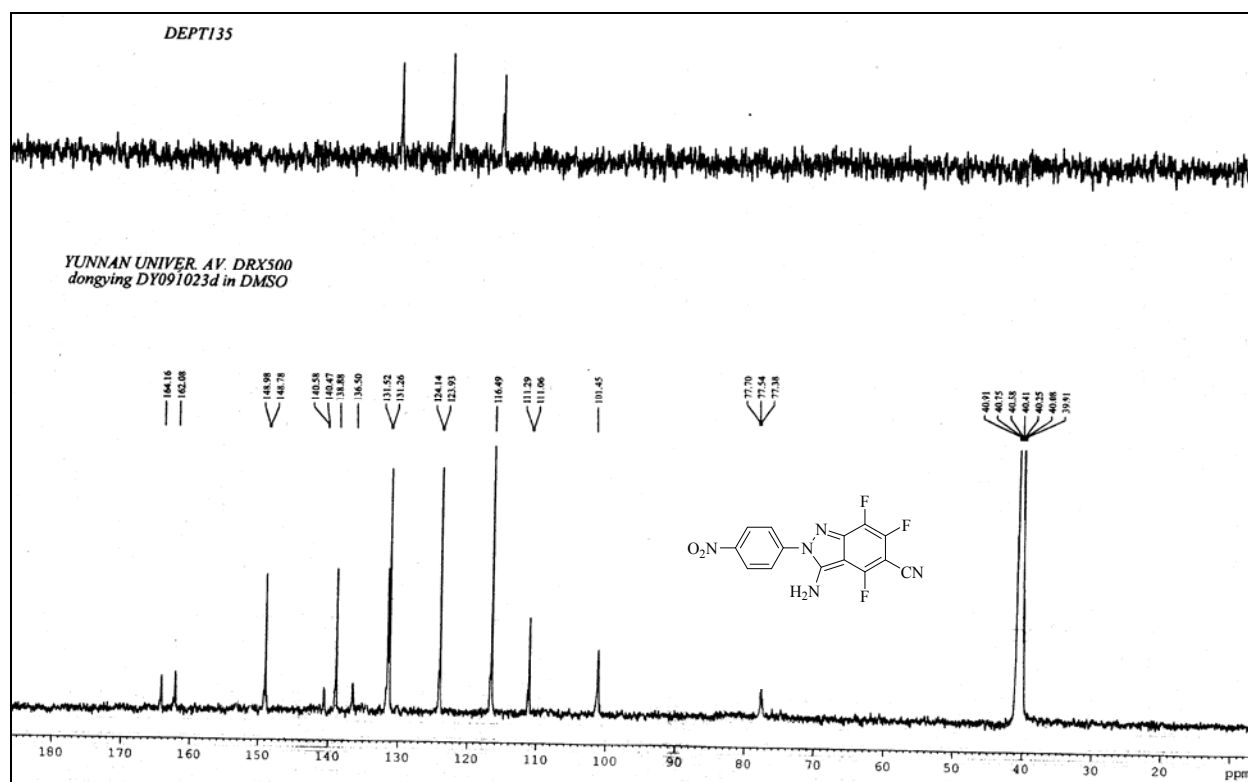

Figure 41.  $^{13}\text{C}$  NMR (125 MHz,  $\text{DMSO-}d_6$ ) spectra of compound 7c

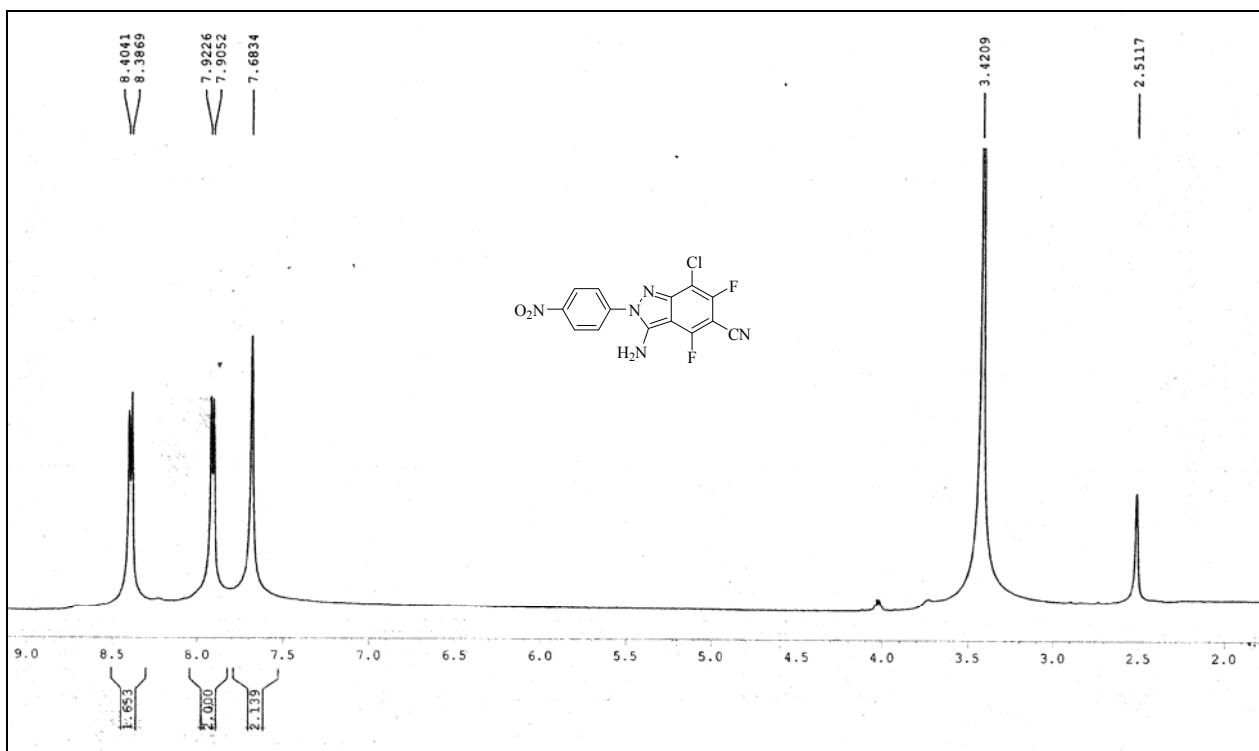

Figure 42.  $^1\text{H}$  NMR (500 MHz,  $\text{DMSO-}d_6$ ) spectra of compound 7d

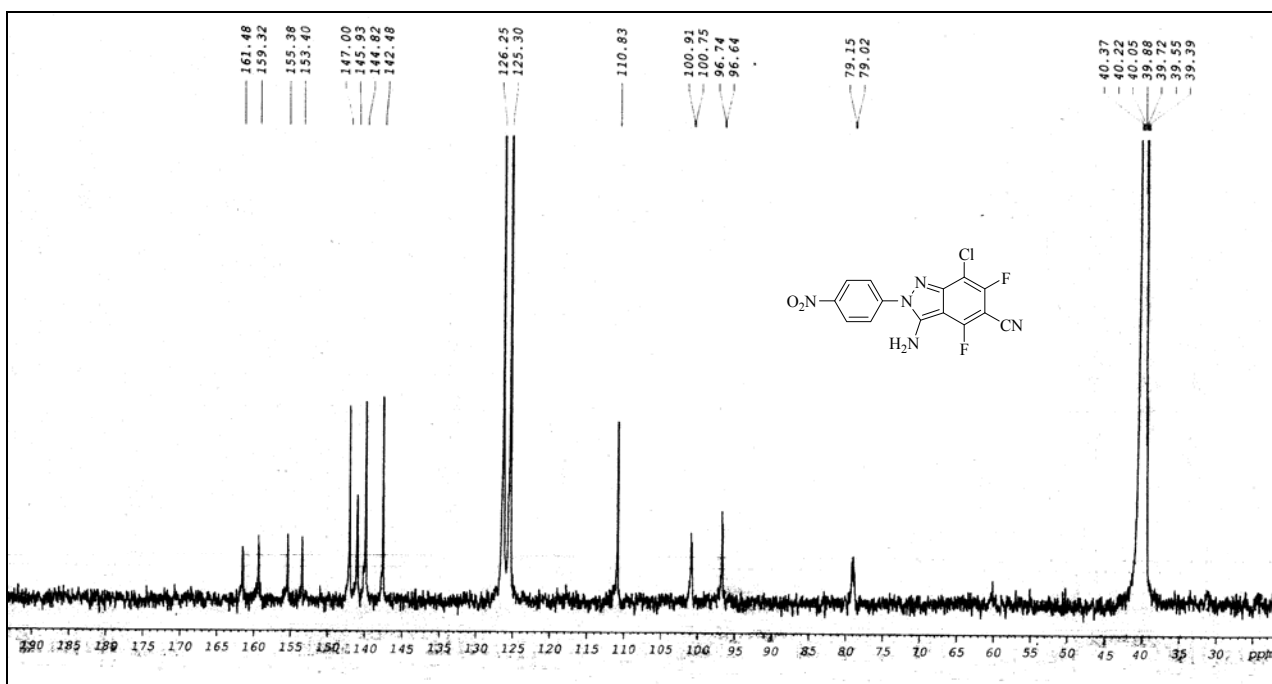

Figure 43.  $^{13}\text{C}$  NMR (125 MHz,  $\text{DMSO-}d_6$ ) spectra of compound 7d

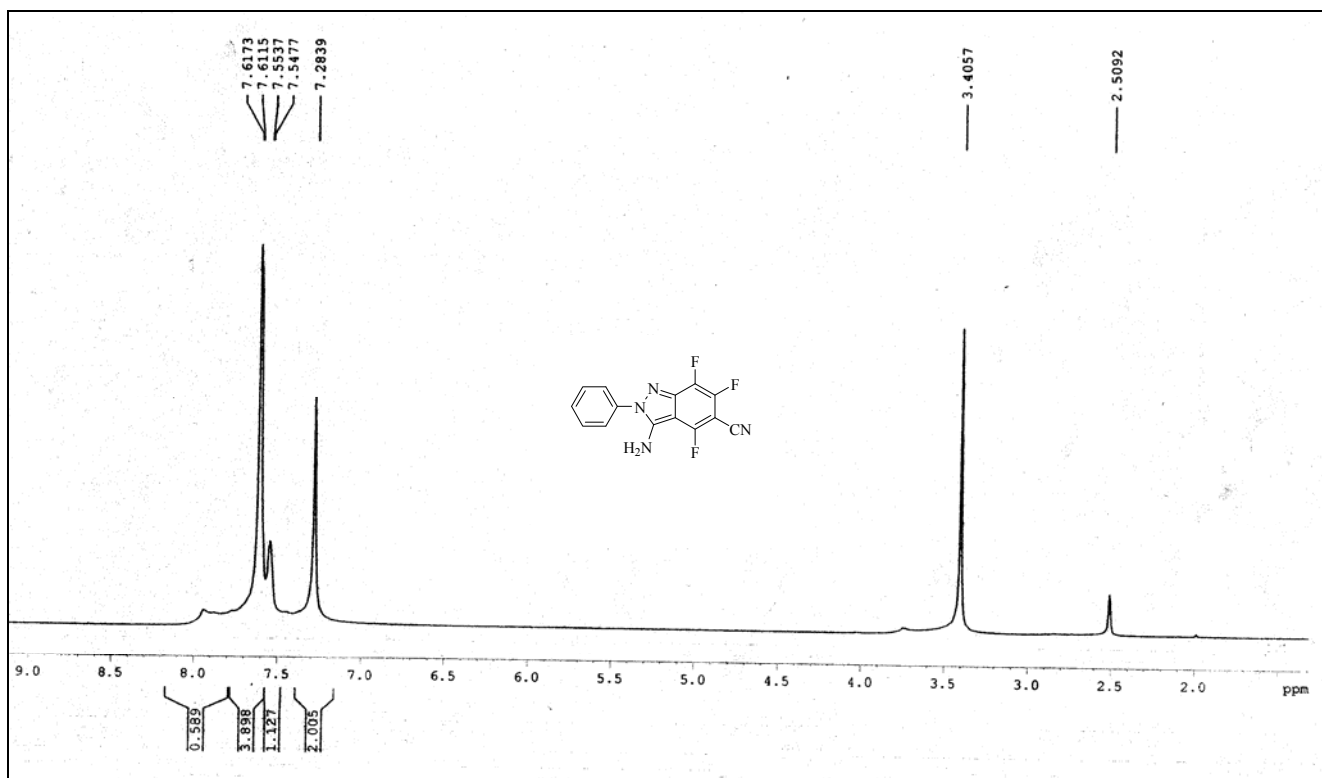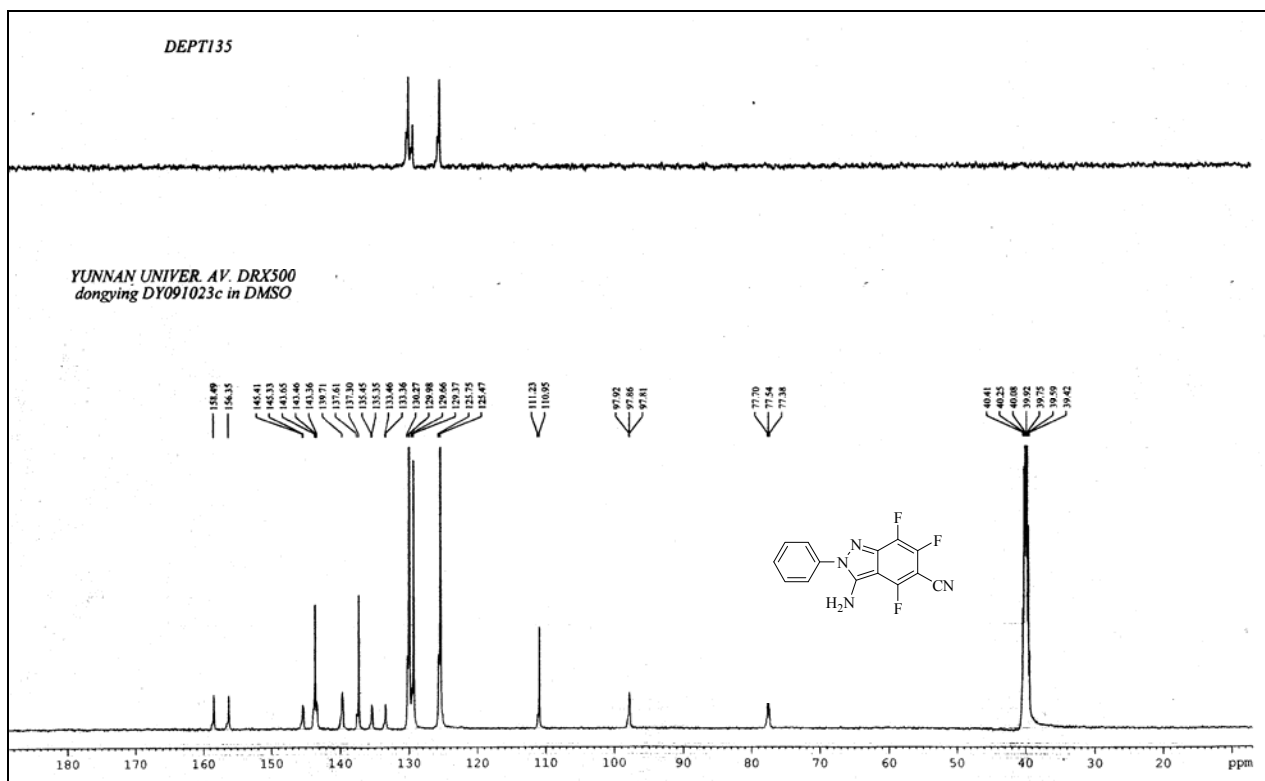

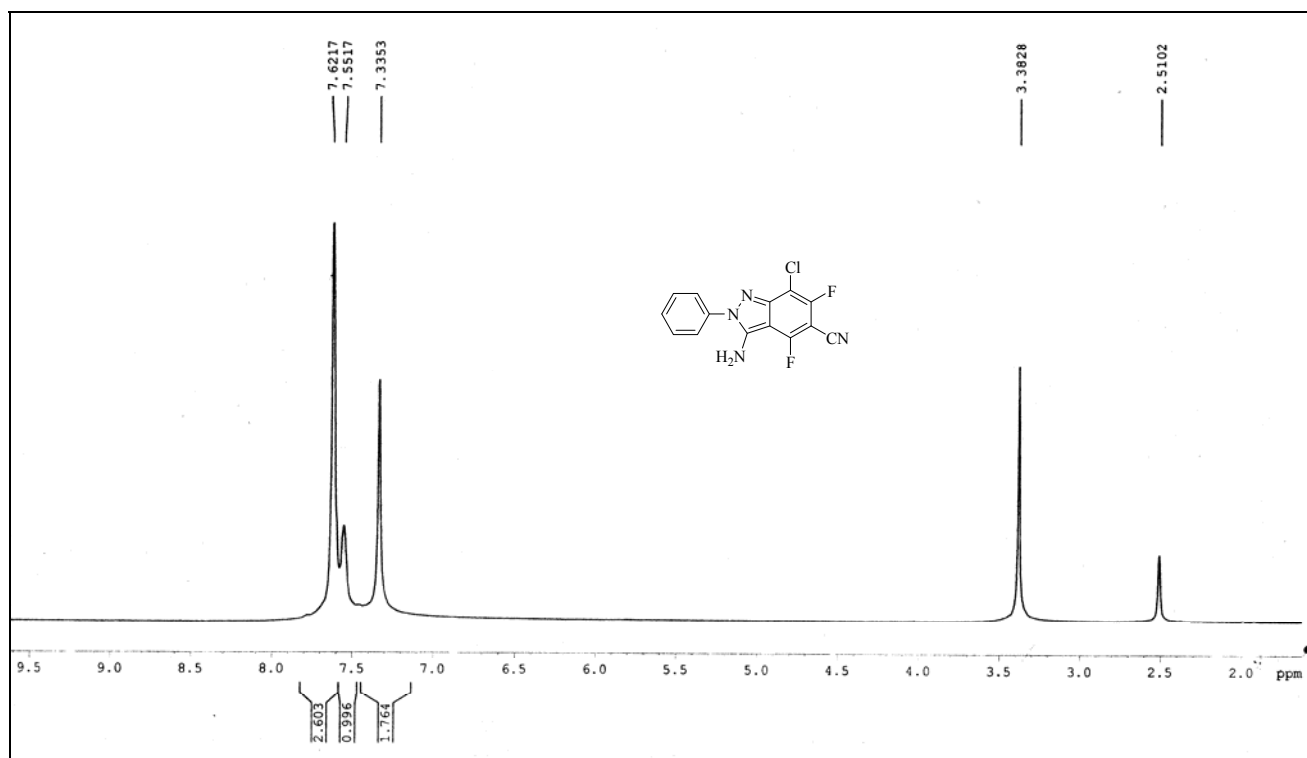

**Figure 46.**  $^1\text{H}$  NMR (500 MHz,  $\text{DMSO-}d_6$ ) spectra of compound **7f**

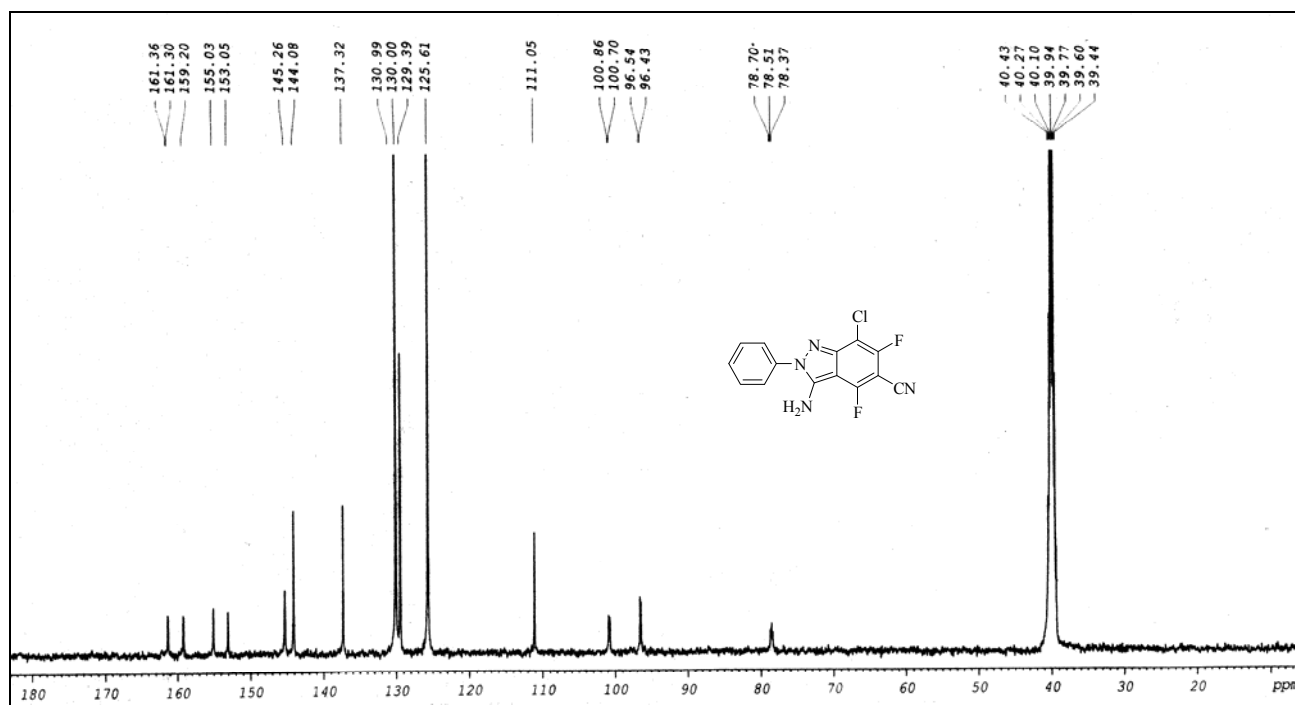

**Figure 47.**  $^{13}\text{C}$  NMR (125 MHz,  $\text{DMSO-}d_6$ ) spectra of compound **7f**

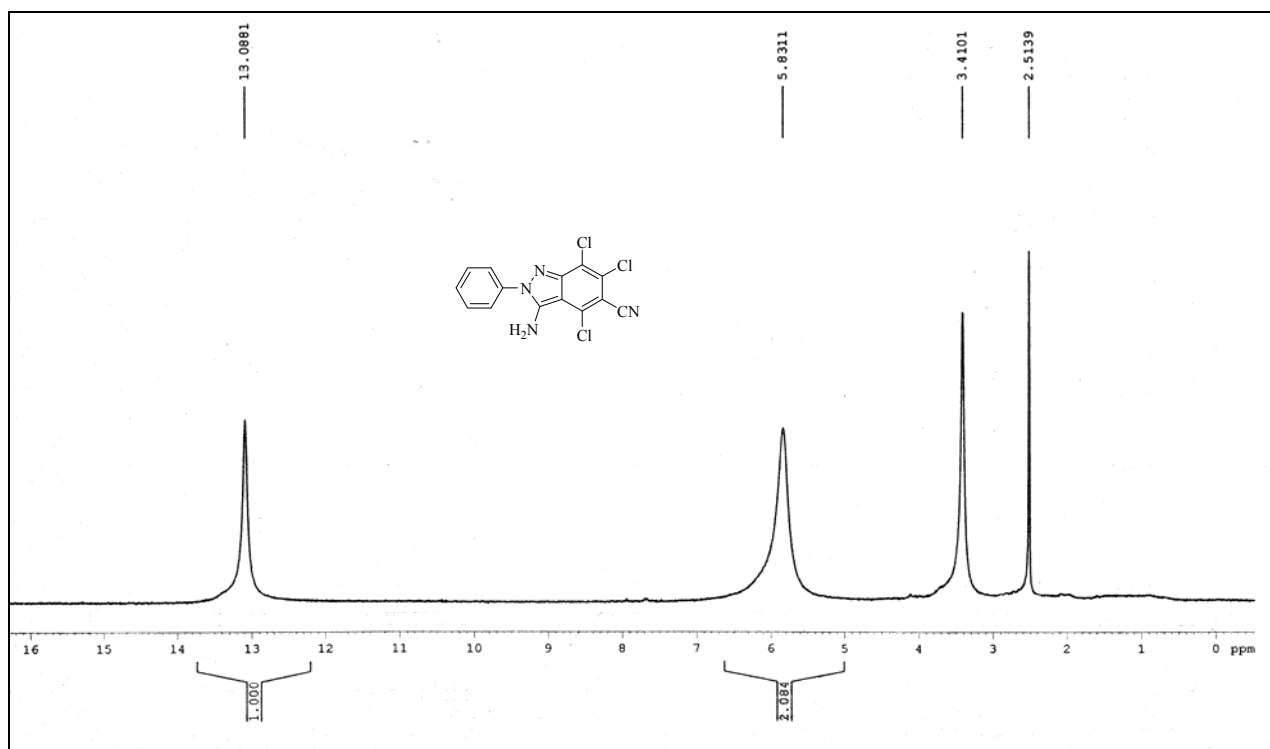

**Figure 48.**  $^1\text{H}$  NMR (500 MHz,  $\text{DMSO-}d_6$ ) spectra of compound **7g**

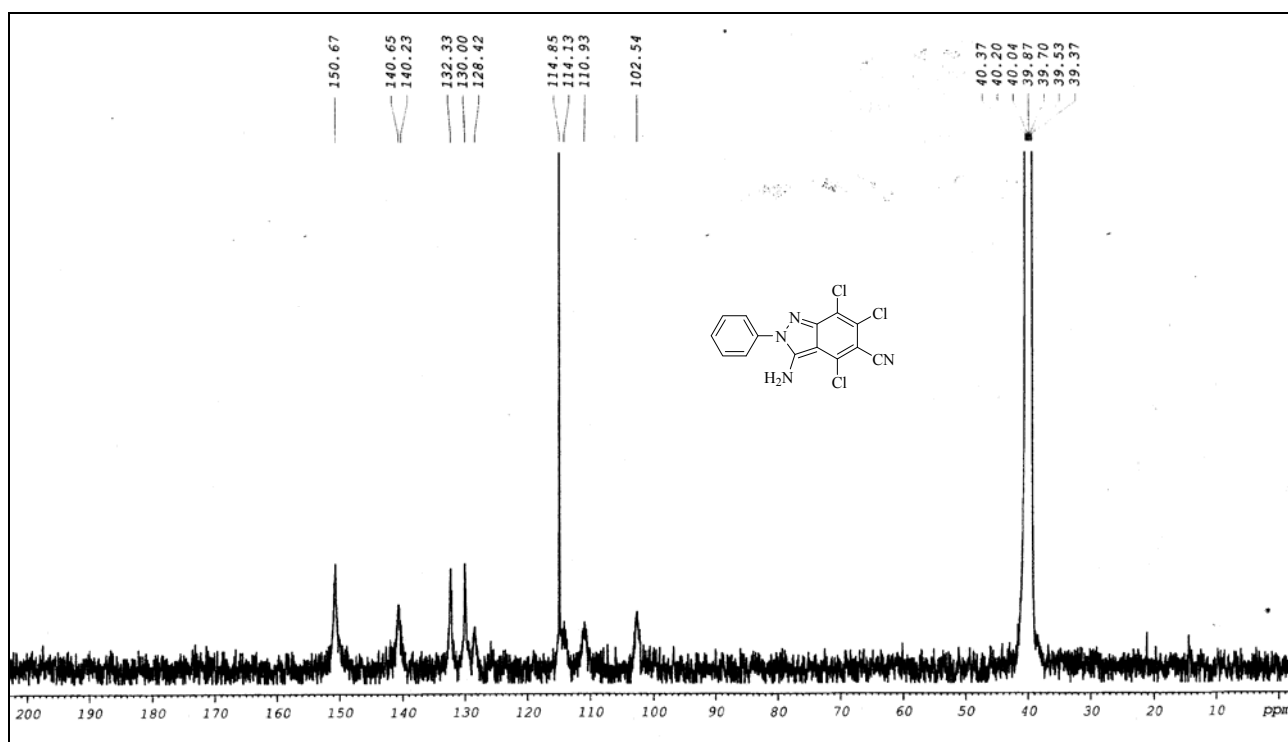

**Figure 49.**  $^{13}\text{C}$  NMR (125 MHz,  $\text{DMSO-}d_6$ ) spectra of compound **7g**
